# Supplementary material for: Regenerative labeling of saccharides
Source: Royal Society of Chemistry journal article supplement (doi:10.1039/c3ra41426d), 2013-01-01
Supplement: c3ra41426d.pdf [file c3ra41426d.pdf]

## Electronic Supplementary Information

### Regenerative Labeling of Saccharides

Hao-Yu Wen,<sup>†</sup> Peng-Hao Hsu,<sup>†</sup> Guei-San Chen<sup>‡</sup> and Jim-Min Fang<sup>†, ‡, \*</sup>

<sup>†</sup> Department of Chemistry, National Taiwan University, Taipei 106, Taiwan

<sup>‡</sup> The Genomics Research Center, Academia Sinica, Taipei 11529, Taiwan

Fax: (886-2)-23637812; E-mail: [jmfang@ntu.edu.tw](mailto:jmfang@ntu.edu.tw)

| Contents                                                                                              | Page number |
|-------------------------------------------------------------------------------------------------------|-------------|
| Determination of the <i>E/Z</i> isomers of oxime ether (Glc- <b>a</b> )Ac <sub>5</sub>                | S2          |
| Determination of the β-pyranoside structure of Glc- <b>b</b>                                          | S2          |
| Mechanistic study for regeneration of saccharides by the one-pot hydrogenolysis–hydrolysis reaction   | S2          |
| <b>Figure S1</b> <sup>1</sup> H NMR spectral analysis of hydrogenolysis–hydrolysis of Man- <b>a</b> . | S3          |
| <b>Figure S2</b> HPLC analysis of the labeling product of maltoheptaose with reagent <b>a</b> .       | S3          |
| Synthesis and characterization of compounds                                                           | S4–S9       |
| <sup>1</sup> H and <sup>13</sup> C NMR spectra                                                        | S10–S36     |

### Determination of the *E/Z* isomers of oxime ether (Glc-a)Ac<sub>5</sub>

The condensation product of D-glucose with reagent **a** using method A was treated with Ac<sub>2</sub>O to give peracetyl-D-glucose *O*-(naphth-2-ylmethyl)oxime (Glc-**a**)Ac<sub>5</sub> as a mixture of *E/Z* isomers in a ratio of 4:1 in CDCl<sub>3</sub> solution according to the <sup>1</sup>H NMR analysis. The proton at the C=N double bond of *E*-isomer appeared at δ 7.36, whereas that of *Z*-isomer displayed at δ 6.59.<sup>s1, s2</sup> The signals of the naphthyl-CH<sub>2</sub> protons occurred at δ 5.20 (*E*-form) and δ 5.27 (*Z*-form).

References:

s1 P. M. Collins, *Chem. Commun.*, 1966, 164–165.

s2 A. Kampf and E. Dimant, *Carbohydr. Res.*, 1971, **16**, 212–214.

### Determination of the β-pyranoside structure of Glc-b

The condensation reaction of D-glucose with reagent **b** using method C gave exclusively *N*-methyl-*N*-(naphth-2-ylmethoxy)glucosylamine (Glc-**b**) as a single isomer. The pyranoside structure of Glc-**b** with β-configuration was deduced from the large coupling constant (8 Hz) of its anomeric proton (doublet at δ<sub>H</sub> 3.91). The characteristic anomeric carbon occurred at δ<sub>C</sub> 93.3 in the <sup>13</sup>C NMR spectrum. The condensation reactions of xylose, lactose, maltohexaose and maltoheptaose with reagent **b** also proceeded smoothly to give exclusively the corresponding glycopyranosylamines Xyl-**b**, Lac-**b**, Glc<sub>6</sub>-**b** and Glc<sub>7</sub>-**b** in β-configuration.

### Mechanistic study for regeneration of saccharides by the one-pot hydrogenolysis–hydrolysis reaction

In the absence of Pd(OH)<sub>2</sub>, our study showed that peracetyl-glycosylamines (Glc-**b**)Ac<sub>4</sub> and (Lac-**b**)Ac<sub>7</sub> were inert in a methanolic solution containing 1–5 equiv of HCl<sub>(aq)</sub> at room temperature. In contrast, (Glc-**b**)Ac<sub>4</sub> and (Lac-**b**)Ac<sub>7</sub> were subject to one-pot hydrogenolysis–hydrolysis by catalysis of Pd(OH)<sub>2</sub>/HCl<sub>(aq)</sub>, giving 2,3,4,6-tetra-*O*-acetyl-D-glucopyranose<sup>s3</sup> and 2,3,6,2',3',4',6'-hepta-*O*-acetyl-lactose<sup>s4</sup>, respectively.

As shown in the main text, treatment of (Glc-**a**)Ac<sub>5</sub> with catalytic amounts of Pd(OH)<sub>2</sub> and HCl<sub>(aq)</sub> in MeOH under an atmosphere of H<sub>2</sub> afforded the corresponding peracetylglucose oxime (Glc-oxime)Ac<sub>5</sub> by hydrogenolysis of the ArCH<sub>2</sub>-O bond. The peracetylated saccharides (Xyl-**a**)Ac<sub>4</sub>, (Fru-**a**)Ac<sub>5</sub> and (Lac-**a**)Ac<sub>8</sub> were also converted to the corresponding oximes (Xyl-oxime)Ac<sub>4</sub>, (Fru-oxime)Ac<sub>5</sub> and (Lac-oxime)Ac<sub>8</sub> on treatment with Pd(OH)<sub>2</sub>/HCl<sub>(aq)</sub> in MeOH under an atmosphere of H<sub>2</sub>. The naphthylmethyl group appeared to play an essential role in the initial hydrogenolysis.

References:

s3 T. Ren and D. Liu, *Tetrahedron Lett.*, 1999, **40**, 7621–7625.

s4 H. Kondo, S. Aoki, Y. Ichikawa, R. L. Halcomb, H. Ritzen and C.-H. Wong, *J. Org. Chem.*, 1994, **59**, 864–877.

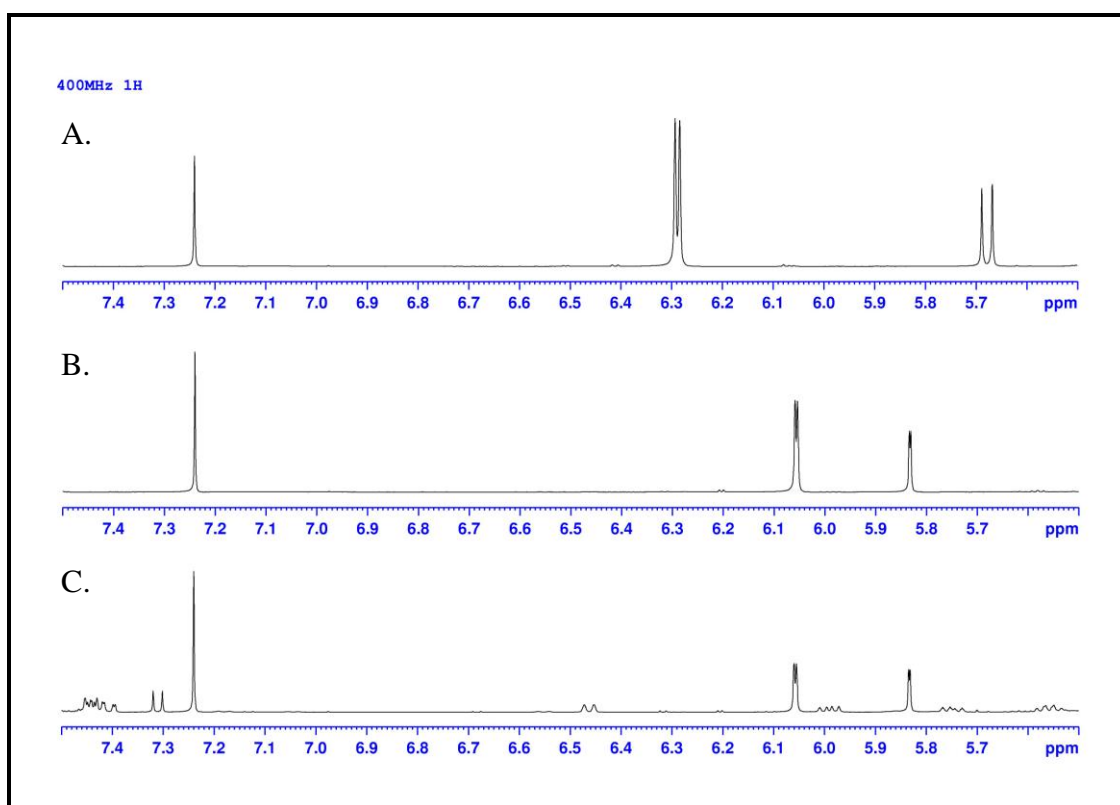

**Figure S1** <sup>1</sup>H NMR spectral analysis (400 MHz, CDCl<sub>3</sub>) for hydrogenolysis–hydrolysis of Man-a. (A) glucose pentaacetate showing H-1 at δ 6.29 (β-anomer) and δ 5.68 (α-anomer); (B) mannose pentaacetate showing H-1 at δ 6.06 (β-anomer) and δ 5.83 (α-anomer); (C) The crude product from hydrogenolysis–hydrolysis of Man-a followed by peracetylation gave mannose pentaacetate without epimerization at the C-2 position.

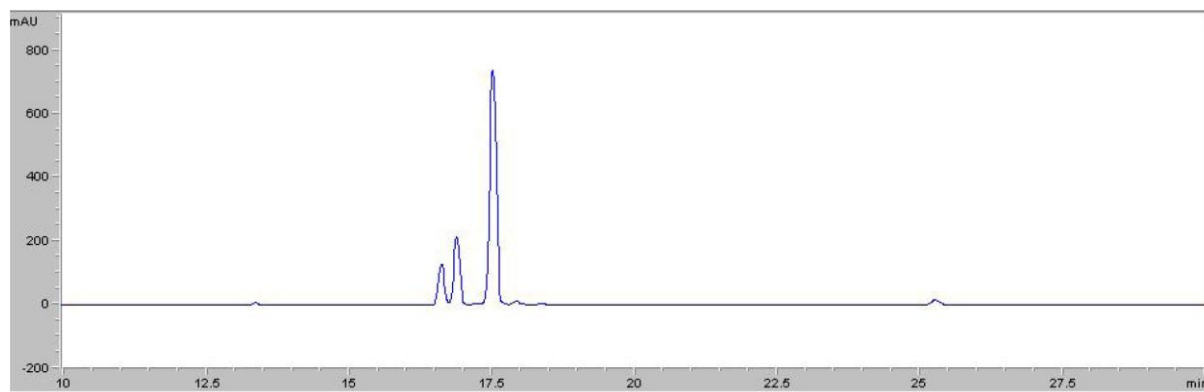

**Figure S2** HPLC analysis of the labeling product of maltoheptaose with reagent a shows three isomers. Loading:  $1.5 \times 10^{-5}$  mol of each component in 20  $\mu$ L solution on Agilent reversed-phase HC-C18 column (5  $\mu$ m porosity, 4.6 mm inner diameter, 250 mm length). Flow rate: 1 mL/min; elution gradients: 0–20% CH<sub>3</sub>CN/H<sub>2</sub>O for 10 min; 20–70% CH<sub>3</sub>CN/H<sub>2</sub>O for 20 min; and 100% CH<sub>3</sub>CN for 15 min. UV detection at 260-nm wavelength. (Note: Although the saccharide derivative bearing a naphthyl group is fluorogenic, the UV detection was applied in this study because there was no fluorescence detector coupled with our HPLC instrument.)

## Synthesis and characterization of compounds

**2,3,4,5,6-*O*-Pentaacetyl-D-glucose *O*-(naphth-2-ylmethyl)oxime [(Glc-a)Ac<sub>5</sub>].** Treatment of D-glucose with reagent **a** (method A), followed by acetylation (Ac<sub>2</sub>O, 25 °C, 4 h) afforded (Glc-a)Ac<sub>5</sub> (92%).  $[\alpha]^{27}_D +58.7$  (*c* 0.5, EtOAc); IR (neat) 1750 cm<sup>-1</sup>; <sup>1</sup>H NMR (400 MHz, CDCl<sub>3</sub>, *E/Z* isomers = 4:1) δ 7.80–7.75 (4 H, m), 7.44–7.37 (3 H, m), 7.36 (0.8 H, d, *J* = 5.3 Hz), 6.59 (0.2 H, d, *J* = 5.6 Hz), 6.09 (0.2 H, t, *J* = 5.2 Hz), 5.62 (0.2 H, t, *J* = 4.8 Hz), 5.51–5.47 (1.6 H, m), 5.41–5.39 (0.2 H, m), 5.38–5.35 (0.8 H, m), 5.20 (1.6 H, s), 5.27 (0.4 H, s), 5.08–5.01 (1 H, m), 4.20–4.14 (0.8 H, m), 4.07–4.03 (0.4 H, m), 4.00–3.97 (0.8 H, m), 2.09 (0.6 H, s), 2.04 (2.4 H, s), 2.02 (2.4 H, s), 2.01 (0.6 H, s), 1.99 (0.6 H, s), 1.98 (2.4 H, s), 1.97 (2.4 H, s), 1.96 (0.6 H, s), 1.95 (2.4 H, s), 1.92 (0.6 H, s); <sup>13</sup>C NMR (100 MHz, CDCl<sub>3</sub>, *E*-oxime) δ 170.3, 169.6, 169.5, 169.2 (2 ×), 144.1, 134.2, 133.0, 132.9, 128.0, 127.8, 127.5, 127.2, 126.0 (2 ×), 125.9, 76.5, 69.2, 69.0, 68.3, 68.1, 61.6, 20.5 (2 ×), 20.4 (2 ×), 20.2; ESI-TOF-HRMS calcd for C<sub>27</sub>H<sub>31</sub>NNaO<sub>11</sub>: 568.1795, found: *m/z* 568.1806 [M + Na]<sup>+</sup>.

***N*-Methyl-*O*-(naphth-2-ylmethyl)-β-D-glucosylamine (Glc-b).** Treatment of D-glucose with reagent **b** (method C) afforded Glc-b (83%) after chromatography (RP-C18, H<sub>2</sub>O/MeOH (20:1 to 1:1)) and lyophilization. <sup>1</sup>H NMR (400 MHz, D<sub>2</sub>O) δ 7.32 (1 H, s), 7.20 (2 H, t, *J* = 8.4 Hz), 7.08 (2 H, m), 6.82–6.72 (2 H, m), 4.56 (2 H, s, CH<sub>2</sub>ON), 3.91 (1 H, d, *J* = 8.0 Hz), 3.66 (1 H, d, *J* = 11.2 Hz), 3.56 (1 H, d, *J* = 8.0 Hz), 3.50–3.40 (2 H, m), 3.31 (1 H, t, *J* = 9.6 Hz), 3.1 (1 H, d, *J* = 8.0 Hz), 2.41 (3 H, s); <sup>13</sup>C NMR (100 MHz, D<sub>2</sub>O) δ 133.8, 132.7, 132.6, 127.8, 127.7 (2 ×), 127.2, 126.7, 125.7 (2 ×), 93.3, 77.1 (2 ×), 75.2, 70.0, 69.2, 60.7, 38.9; ESI-TOF-HRMS calcd for C<sub>18</sub>H<sub>24</sub>NO<sub>6</sub>: 350.1604, found: *m/z* 350.1602 [M + H]<sup>+</sup>.

***N*-Methyl-*N*-(naphth-2-ylmethoxy)-β-2,3,4,6-tetraacetyl-D-glucosylamine [(Glc-b)Ac<sub>4</sub>].** Acetylation of Glc-b afforded (Glc-b)Ac<sub>4</sub> (98%).  $[\alpha]^{23}_D -29.6$  (*c* 0.5, CH<sub>2</sub>Cl<sub>2</sub>); IR (neat) 1735 cm<sup>-1</sup>; <sup>1</sup>H NMR (400 MHz, CDCl<sub>3</sub>) δ 7.80–7.77 (3 H, m), 7.72 (1 H, s), 7.48–7.42 (3 H, m), 5.20 (1 H, t, *J* = 9.2 Hz), 5.09–5.00 (2 H, m), 4.72 (2 H, s), 4.32 (1 H, d, *J* = 9.6 Hz), 4.25 (1 H, dd, *J* = 12.3, 4.4 Hz), 4.13 (1 H, dd, *J* = 12.3, 2.4 Hz), 3.67–3.62 (1 H, m), 2.65 (3 H, s), 2.01 (3 H, s), 1.98 (3 H, s), 1.97 (3 H, s), 1.93 (3 H, s); <sup>13</sup>C NMR (100 MHz, CDCl<sub>3</sub>) δ 170.6, 170.1, 169.4 (2 ×), 134.4, 133.1, 133.0, 127.9 (2 ×), 127.8, 127.6, 126.7, 126.0, 125.9, 92.4, 75.1, 73.8, 73.2, 68.4 (2 ×), 62.0, 37.5, 20.61, 20.58, 20.52, 20.48; ESI-TOF-HRMS calcd for C<sub>26</sub>H<sub>31</sub>NO<sub>10</sub>: 518.2040, found: *m/z* 518.2060 [M + H]<sup>+</sup>.

***N*-Methyl-*N*-methoxy-β-2,3,4,6-tetraacetyl-D-glucosylamine.** Treatment of D-glucose with (*N*-methoxy)methanamine hydrochloride (method C), followed by acetylation, afforded the title compound (85%).  $[\alpha]^{24}_D +44.11$  (*c* 0.7, EtOAc); IR (neat) 1752 cm<sup>-1</sup>; <sup>1</sup>H NMR (400 MHz, CDCl<sub>3</sub>) δ 5.22 (1 H, t, *J* = 9.2 Hz), 5.11 (1 H, t, *J* = 9.2 Hz), 5.04 (1 H, t, *J* = 9.6 Hz), 4.29–4.22 (2 H, m), 4.13 (1 H, dd, *J* = 12, 2.4 Hz), 3.67–3.63 (1 H, m), 3.41 (3 H, s), 2.68 (3 H, s), 2.05 (3 H, s), 2.03 (3 H, s), 2.00 (3 H, s), 1.99 (3 H, s); <sup>13</sup>C NMR (100 MHz, CDCl<sub>3</sub>) δ 170.7, 170.3, 169.5, 169.4, 92.1, 73.9, 73.3, 68.5, 68.4, 62.2, 60.2, 37.3, 20.78, 20.72, 20.62, 20.58; ESI-TOF-HRMS calcd for C<sub>16</sub>H<sub>26</sub>NO<sub>10</sub>: 392.1557, found: *m/z* 392.1554 [M + H]<sup>+</sup>.

**2,3,4,5,6-*O*-Pentaacetyl-D-glucose oxime [(Glc-oxime)Ac<sub>5</sub>].** Hydrogenolysis–hydrolysis of (Glc-**a**)Ac<sub>5</sub> afforded (Glc-oxime)Ac<sub>5</sub> (73%) after chromatography (silica gel, EtOAc/hexane (1:3 to 1:1)).  $[\alpha]_D^{28} +41.7$  (*c* 0.6, EtOAc); IR (neat) 3403, 1749 cm<sup>-1</sup>; <sup>1</sup>H NMR (400 MHz, CDCl<sub>3</sub>, *E/Z* isomers = 7:3)  $\delta$  8.93 (0.3 H, s), 8.51 (0.7 H, s), 7.31 (0.7 H, d, *J* = 5.7 Hz), 6.56 (0.3 H, d, *J* = 5.4 Hz), 6.09 (0.3 H, t, *J* = 5.4 Hz), 5.59 (0.3 H, t, *J* = 5.2 Hz), 5.47–5.46 (1.4 H, m), 5.39–5.34 (1 H, m), 5.09–5.04 (1 H, m), 4.27–4.19 (1 H, m), 4.10–4.01 (1 H, m), 2.11 (0.9 H, s), 2.09 (2.1 H, s), 2.07 (0.9 H, s), 2.05 (4.2 H, s), 2.04 (0.9 H, s), 2.03 (0.9 H, s), 2.02 (2.1 H, s), 2.01 (3 H, s); <sup>13</sup>C NMR (100 MHz, CDCl<sub>3</sub>, *E/Z*-isomers)  $\delta$  170.6, 169.80, 169.7, 169.4, 146.2, 145.2, 69.3, 69.1, 69.0, 68.8, 68.4, 68.3, 65.5, 61.7, 61.5, 20.7, 20.62, 20.57, 20.46; ESI-TOF-HRMS calcd for C<sub>16</sub>H<sub>23</sub>NNaO<sub>11</sub>: 428.1169, found: *m/z* 428.1164 [M + Na]<sup>+</sup>.

**2,3,4,5,6-*O*-Pentaacetyl-D-mannose *O*-(naphth-2-ylmethyl)oxime [(Man-a)Ac<sub>5</sub>].** Treatment of D-mannose with reagent **a** (method A), followed by acetylation (Ac<sub>2</sub>O, 25 °C, 4 h) afforded (Man-**a**)Ac<sub>5</sub> (90%).  $[\alpha]_D^{23} +19.5$  (*c* 0.5, EtOAc); IR (neat) 1752 cm<sup>-1</sup>; <sup>1</sup>H NMR (400 MHz, CDCl<sub>3</sub>, *E/Z* isomers = 4:1)  $\delta$  7.80–7.74 (4 H, m), 7.46–7.39 (3 H, m), 7.32 (0.8 H, d, *J* = 7.2 Hz), 6.69 (0.2 H, d, *J* = 6.4 Hz), 6.14 (0.2 H, t, *J* = 6.4 Hz), 5.50–5.48 (0.2 H, m), 5.48–5.45 (0.8 H, m), 5.43–5.40 (1 H, m), 5.28–5.27 (0.8 H, m), 5.20 (2 H, s), 5.13–5.09 (0.2 H, m), 5.08–5.04 (0.8 H, m), 4.18–4.14 (1 H, m), 4.10–4.08 (0.2 H, m), 4.05–4.01 (0.8 H, m), 2.02–1.94 (12 H, m), 1.76 (3 H, s); <sup>13</sup>C NMR (100 MHz, CDCl<sub>3</sub>, *E*-oxime)  $\delta$  170.4, 169.7, 169.6, 169.4, 169.1, 145.3, 134.4, 133.1, 133.0, 128.1, 127.9, 127.5, 127.2, 126.1, 126.0, 125.9, 76.5, 68.3, 68.1, 67.7, 67.0, 61.7, 20.6 (2 ×), 20.5, 20.4, 20.2; ESI-TOF-HRMS calcd for C<sub>27</sub>H<sub>31</sub>NNaO<sub>11</sub>: 568.1795, found: *m/z* 568.1799 [M + Na]<sup>+</sup>.

***N*-Methyl-*N*-(naphth-2-ylmethoxy)-2,3,4,6-tetraacetyl-D-mannosylamine [(Man-b)Ac<sub>4</sub>].** Treatment of D-mannose with reagent **b** (method C), followed by acetylation (Ac<sub>2</sub>O, 25 °C, 4 h) afforded (Man-**b**)Ac<sub>4</sub> (62%). IR (neat) 1748 cm<sup>-1</sup>; <sup>1</sup>H NMR (400 MHz, CDCl<sub>3</sub>,  $\alpha/\beta$  anomers = 2:1)  $\delta$  7.85–7.77 (4 H, m), 7.53–7.42 (3 H, m), 5.80 (0.67 H, t, *J* = 3.0 Hz), 5.59 (0.33 H, dd, *J* = 6.4, 4.8 Hz), 5.51 (0.67 H, dd, *J* = 4.8, 3.2 Hz), 5.47 (0.67 H, d, *J* = 3.2 Hz), 5.30 (0.33 H, t, *J* = 9.6 Hz), 5.24–5.20 (0.33 H, m), 4.98 (1.34 H, s,  $\alpha$ -form CH<sub>2</sub>ON), 4.81 (0.66 H, s,  $\beta$ -form CH<sub>2</sub>ON), 4.68 (0.34 H, d, *J* = 6.4 Hz), 4.47 (0.33 H, dd, *J* = 12, 2 Hz), 4.32 (0.33 H, dd, *J* = 12, 2.8 Hz), 4.23–4.04 (3 H, m), 2.67 (1 H, s,  $\beta$ -form CH<sub>3</sub>NO), 2.62 (2 H, s,  $\alpha$ -form CH<sub>3</sub>NO), 2.11 (2 H, s), 2.03 (3 H, s), 2.02 (2 H, s), 2.00 (2 H, s), 1.95 (1 H, s), 1.94 (1 H, s), 1.93 (1 H, s); <sup>13</sup>C NMR (100 MHz, CDCl<sub>3</sub>,  $\alpha/\beta$  anomers = 2:1)  $\delta$  170.4, 170.1, 169.8, 169.5, 169.4, 133.7, 133.1, 133.0, 128.1, 128.0, 127.9, 127.8, 127.5, 126.7, 126.0, 125.93, 125.89, 96.5 ( $\beta$ -form anomeric), 91.8 ( $\alpha$ -form anomeric), 77.0, 75.6, 75.5, 71.7, 71.1, 70.9, 69.9, 68.0, 65.9, 62.9, 62.7, 40.9 ( $\alpha$ -form CH<sub>3</sub>NO), 40.2 ( $\beta$ -form CH<sub>3</sub>NO), 20.7, 20.54, 20.51, 20.48, 20.3, 20.2; ESI-TOF-HRMS calcd for C<sub>26</sub>H<sub>31</sub>NNaO<sub>10</sub>: 540.1840, found: *m/z* 540.1835 [M + Na]<sup>+</sup>.

**2,3,4,5-*O*-Tetraacetyl-D-xylose *O*-(naphth-2-ylmethyl)oxime [(Xyl-a)Ac<sub>4</sub>].** Treatment of D-xylose with reagent **a** (method A), followed by acetylation, afforded (Xyl-**a**)Ac<sub>4</sub> (93%).

$[\alpha]_{\text{D}}^{27} +56.8$  (*c* 0.7, EtOAc); IR (neat) 1749  $\text{cm}^{-1}$ ;  $^1\text{H}$  NMR (400 MHz,  $\text{CDCl}_3$ , *E/Z* isomers = 4:1)  $\delta$  7.81–7.75 (4 H, m), 7.48–7.40 (3 H, m), 7.35 (0.8 H, d, *J* = 6 Hz), 6.64 (0.2 H, d, *J* = 5.4 Hz), 6.08 (0.2 H, t, *J* = 5.2 Hz), 5.57 (0.2 H, dd, *J* = 6, 1.7 Hz), 5.57 (0.8 H, t, *J* = 6.2 Hz), 5.44 (0.8 H, dd, *J* = 6.7, 4.2 Hz), 5.31–5.25 (1 H, m), 5.20 (2 H, s), 4.30–4.26 (0.2 H, m), 4.27–4.22 (0.8 H, m), 4.09–4.04 (0.2 H, m), 3.97–3.92 (0.8 H, m), 2.08 (0.6 H, s), 2.03 (3 H, s), 2.01 (2.4 H, s), 1.97 (2.4 H, s), 1.96 (2.4 H, s), 1.91 (0.6 H, s), 1.78 (0.6 H, s);  $^{13}\text{C}$  NMR (100 MHz,  $\text{CDCl}_3$ , *E/Z* isomers)  $\delta$  170.1, 169.6, 169.41, 169.37, 169.33, 169.32, 169.1, 146.0, 144.3, 134.2, 134.1, 133.1, 133.0, 132.9, 128.02, 127.96, 127.83, 127.79, 127.4, 127.2, 126.8, 126.0, 125.9, 125.6, 76.8, 76.5, 69.6, 69.03, 68.99, 68.9, 68.5, 65.9, 61.5, 61.3, 20.5, 20.42, 20.35, 20.2, 20.1; ESI-TOF-HRMS calcd for  $\text{C}_{24}\text{H}_{27}\text{NNaO}_9$ : 496.1584, found: *m/z* 496.1568  $[\text{M} + \text{Na}]^+$ .

***N*-Methyl-*N*-(naphth-2-ylmethoxy)- $\beta$ -D-xylosylamine (Xyl-b).** Treatment of D-xylose with reagent **b** (method C) afforded Xyl-**b** (91%). Mp 174–175  $^{\circ}\text{C}$ ;  $[\alpha]_{\text{D}}^{18} -43.3$  (*c* 0.5, MeOH);  $^1\text{H}$  NMR (400 MHz,  $\text{CD}_3\text{OD}$ )  $\delta$  7.86–7.83 (4 H, m), 7.53–7.46 (3 H, m), 4.92 (2 H, s), 3.98 (1 H, d, *J* = 9.0 Hz), 3.89 (1 H, dd, *J* = 11.5, 5.2 Hz), 3.51 (1 H, t, *J* = 9.0 Hz), 3.49–3.43 (1 H, m), 3.31 (1 H, H-3), 3.16 (1 H, t, *J* = 11.5 Hz), 2.71 (3 H, s, N-Me);  $^{13}\text{C}$  NMR (100 MHz,  $\text{CD}_3\text{OD}$ )  $\delta$  136.2, 134.9, 134.8, 129.1 (3  $\times$ ), 128.8, 127.3, 127.2, 96.6, 79.6, 76.6, 71.9, 71.3, 69.0, 39.5; ESI-TOF-HRMS calcd for  $\text{C}_{17}\text{H}_{22}\text{NO}_5$ : 320.1498, found: *m/z* 320.1494  $[\text{M} + \text{H}]^+$ .

**2,3,4,5-*O*-Tetraacetyl-D-xylose oxime [(Xyl-oxime)Ac<sub>4</sub>].** Hydrogenolysis–hydrolysis of (Xyl-**a**)Ac<sub>4</sub> afforded (Xyl-oxime)Ac<sub>4</sub> (91%) after chromatography (silica gel, EtOAc/hexane (1:4 to 1:1)).  $[\alpha]_{\text{D}}^{28}$  (*E/Z* isomers) +38.5 (*c* 1.575, EtOAc); IR (neat) 3426, 1750  $\text{cm}^{-1}$ ;  $^1\text{H}$  NMR (400 MHz,  $\text{CDCl}_3$ , *E/Z* isomers = 7:3)  $\delta$  9.63 (0.3 H, s), 9.26 (0.7 H, s), 7.20 (0.7 H, d, *J* = 5.9 Hz), 6.46 (0.3 H, d, *J* = 5.6 Hz), 5.99 (0.3 H, t, *J* = 5.9 Hz), 5.49–5.43 (1 H, m), 5.35–5.32 (0.7 H, m), 5.21–5.17 (0.7 H, m), 5.16–5.12 (0.3 H, m), 4.20–4.16 (1 H, m), 3.94–3.85 (1 H, m), 2.01 (0.9 H, s), 1.99 (2.1 H, s), 1.97 (6 H, s), 1.95 (0.9 H, s), 1.92 (2.1 H, s);  $^{13}\text{C}$  NMR (100 MHz,  $\text{CDCl}_3$ , *E/Z*-isomers)  $\delta$  170.4, 170.0, 169.9, 169.64, 169.57, 169.5, 169.4, 145.8, 144.8, 69.7, 69.0, 68.9, 68.5, 65.3, 61.5, 61.42, 20.5, 20.4, 20.34, 20.32, 20.29, 20.21, 20.18; ESI-TOF-HRMS calcd for  $\text{C}_{13}\text{H}_{19}\text{NNaO}_9$ : 356.0958, found: *m/z* 356.0957  $[\text{M} + \text{Na}]^+$ .

**1,3,4,5,6-*O*-Pentaacetyl-D-fructose *O*-(naphth-2-ylmethyl)oxime [(Fru-a)Ac<sub>5</sub>].** Treatment of D-fructose with reagent **a** (method A), followed by acetylation, afforded (Fru-**a**)Ac<sub>5</sub> (91%).  $[\alpha]_{\text{D}}^{27} +12.7$  (*c* 0.9, EtOAc); IR (neat) 1748  $\text{cm}^{-1}$ ;  $^1\text{H}$  NMR (400 MHz,  $\text{CDCl}_3$ , *E/Z* isomers = 3:2)  $\delta$  7.82–7.68 (4 H, m), 7.47–7.34 (3 H, m), 6.24 (0.6 H, d, *J* = 3.2 Hz), 5.90 (0.6 H, dd, *J* = 8.6, 3.2 Hz), 5.67 (0.4 H, d, *J* = 4.2 Hz), 5.55 (0.4 H, dd, *J* = 7.5, 4.2 Hz), 5.29 (1 H, m), 5.21–5.14 (1.8 H, m), 4.95 (1 H, d, *J* = 1.2 Hz), 4.77 (0.6 H, d, *J* = 12.8 Hz), 4.47 (0.6 H, d, *J* = 12.8 Hz), 4.25–4.16 (1 H, m), 4.13–4.01 (1 H, m), 2.06 (1.2 H, s), 2.05 (1.8 H, s), 2.04 (1.8 H, s), 1.98 (1.2 H, s), 1.97 (3 H, s), 1.93 (1.2 H, s), 1.91 (1.8 H, s),



1.82 (1.8 H, s), 1.79 (1.2 H, s);  $^{13}\text{C}$  NMR (100 MHz,  $\text{CDCl}_3$ , *E/Z* isomers)  $\delta$  170.2, 170.1, 169.59, 169.54, 169.4, 169.34, 169.28, 169.23, 168.8, 150.8, 150.7, 134.4, 133.9, 133.0, 132.9, 132.78, 132.75, 127.84, 127.82, 127.72, 127.70, 127.4, 126.7, 126.5, 125.9, 125.8, 125.5, 125.4, 76.9, 76.7, 68.7, 68.58, 68.56, 67.99, 67.91, 66.8, 61.5, 61.3, 61.0, 57.7, 20.38, 20.35, 20.31, 20.24, 20.17, 20.1, 20.0; ESI-TOF-HRMS calcd for  $\text{C}_{27}\text{H}_{31}\text{NNaO}_{11}$ : 568.1795, found:  $m/z$  568.1805  $[\text{M} + \text{Na}]^+$ .

**1,3,4,5,6-*O*-Pentaacetyl-D-fructose oxime [(Fru-oxime)Ac<sub>5</sub>].** Hydrogenolysis–hydrolysis of (Fru-**a**)Ac<sub>5</sub> afforded (Fru-oxime)Ac<sub>5</sub> (275 mg, 81%) after chromatography (silica gel, EtOAc/hexane (1:4 to 1:2)).  $[\alpha]_{\text{D}}^{28} +25.1$  (*c* 1.4, EtOAc); IR (neat) 3400, 1749  $\text{cm}^{-1}$ ;  $^1\text{H}$  NMR (400 MHz,  $\text{CDCl}_3$ , *E/Z* isomers = 3:2)  $\delta$  9.84 (0.6 H, s), 9.64 (0.4 H, s), 6.13 (0.6 H, d, *J* = 3.3 Hz), 5.72 (0.6 H, dd, *J* = 8.5, 3.3 Hz), 5.56 (0.4 H, d, *J* = 3.9 Hz), 5.42 (0.4 H, dd, *J* = 7.9, 3.9 Hz), 5.11–5.07 (1 H, m), 4.83 (0.8 H, d, *J* = 5.6 Hz), 4.65 (0.6 H, d, *J* = 13 Hz), 4.35 (0.6 H, d, *J* = 13 Hz), 4.19–4.11 (1 H, m), 4.09–3.97 (1 H, m), 2.01 (1.2 H, s), 1.97 (1.8 H, s), 1.96 (1.8 H, s), 1.94 (3 H, s), 1.92 (4.2 H, s), 1.91 (1.2 H, m), 1.90 (1.8 H, s);  $^{13}\text{C}$  NMR (100 MHz,  $\text{CDCl}_3$ , *E/Z*-isomers)  $\delta$  170.6, 170.5, 169.94, 169.87, 169.8, 169.7, 169.6, 169.5, 169.4, 169.2, 150.8, 150.5, 68.6, 68.5, 68.4, 68.1, 68.0, 66.4, 61.8, 61.5, 61.1, 57.3, 20.41, 20.39, 20.31, 20.29, 20.22, 20.16, 20.12, 20.11; ESI-TOF-HRMS calcd for  $\text{C}_{16}\text{H}_{23}\text{NNaO}_{11}$ : 428.1169, found:  $m/z$  428.1168  $[\text{M} + \text{Na}]^+$ .

**D-Glucuronic acid *O*-(naphtha-2-ylmethyl)oxime (GlcA-a).** Treatment of D-glucuronic acid with reagent **a** (method A) afforded GlcA-a (67%) after chromatography (RP-C18, MeOH/H<sub>2</sub>O (1:9 to 1:3)). Mp 163–166 °C;  $[\alpha]_{\text{D}}^{23} -8.2$  (*c* 0.5, MeOH); IR (neat) 3356, 1780  $\text{cm}^{-1}$ ;  $^1\text{H}$  NMR (400 MHz,  $\text{CD}_3\text{OD}$ )  $\delta$  7.85–7.83 (4 H, m), 7.60 (1 H, d, *J* = 5.2 Hz), 7.50–7.46 (3 H, m), 5.25 (2 H, s), 4.60 (1 H, dd, *J* = 8.0, 5.2 Hz), 4.48 (1 H, d, *J* = 4.8 Hz), 4.43 (1 H, dd, *J* = 8.0, 2.8 Hz), 4.36 (1 H, dd, *J* = 4.8, 2.8 Hz);  $^{13}\text{C}$  NMR (100 MHz,  $\text{CD}_3\text{OD}$ )  $\delta$  177.9, 149.7, 136.7, 134.9, 134.7, 129.2, 129.1, 128.8, 128.3, 127.4, 127.3, 127.2, 87.8, 77.3, 72.2, 71.1, 68.9; ESI-TOF-HRMS (negative mode) calcd for  $\text{C}_{17}\text{H}_{18}\text{NO}_7$ : 348.1083, found:  $m/z$  348.1067  $[\text{M} - \text{H}]^-$ .

***O*-Peracetyl-D-lactose *O*-(naphth-2-ylmethyl)oxime [(Lac-a)Ac<sub>8</sub>].** Treatment of D-lactose with reagent **a** (method A), followed by acetylation, afforded (Lac-a)Ac<sub>8</sub> (92%). Mp 77.5–80 °C;  $[\alpha]_{\text{D}}^{25} +50.8$  (*c* 0.5, EtOAc); IR (neat) 1748  $\text{cm}^{-1}$ ;  $^1\text{H}$  NMR (400 MHz,  $\text{CDCl}_3$ , *E/Z* isomers = 4:1)  $\delta$  7.85–7.79 (4 H, m), 7.49–7.45 (3.8 H, m), 6.65 (0.2 H, d, *J* = 5.0 Hz), 6.04 (0.2 H, t, *J* = 4.6 Hz), 5.77–5.73 (0.8 H, m), 5.66–5.62 (0.2 H, m), 5.50–5.47 (0.8 H, m), 5.33–5.30 (0.4 H, m), 5.27 (0.2 H, s), 5.23 (1.6 H, s), 5.20 (0.8 H, d, *J* = 3.2 Hz), 5.11–5.05 (1 H, m), 5.03–4.99 (0.8 H, m), 4.96–4.92 (0.2 H, m), 4.69–4.65 (0.8 H, m), 4.53 (0.2 H, d, *J* = 7.9 Hz), 4.47–4.41 (0.2 H, m), 4.36–4.33 (0.8 H, m), 4.31–4.27 (0.2 H, m), 4.13–4.00 (4 H, m), 3.90–3.79 (1 H, m), 3.47 (0.8 H, m), 2.11 (0.6 H, s), 2.08 (2.4 H, s), 2.05–1.95 (18 H, m), 1.93 (2.4 H, s), 1.88 (0.6 H, s);  $^{13}\text{C}$  NMR (100 MHz,  $\text{CDCl}_3$ , *E*-oxime)  $\delta$  170.4, 170.3, 170.2, 170.0, 169.9, 169.7, 169.6, 169.2, 146.2, 135.0, 133.2, 133.0, 128.3, 125.9, 127.8, 127.5, 126.5, 126.4, 126.3, 101.5, 76.4, 70.9, 70.8, 69.3, 69.1, 68.9, 68.7, 66.7 (2 ×), 62.1, 61.3, 20.8,

20.7, 20.62 (2 ×), 20.59 (3 ×), 20.5; ESI-TOF-HRMS calcd for C<sub>39</sub>H<sub>47</sub>NNaO<sub>19</sub>: 856.2640, found: *m/z* 856.2653 [M + Na]<sup>+</sup>.

***N*-Methyl-*N*-(naphth-2-ylmethoxy)-β-2,2',3,3',4',6,6'-heptaacetyl-D-lactosylamine [(Lac-**b**)Ac<sub>7</sub>].** Treatment of D-lactose with reagent **b** (method C), followed by acetylation, afforded (Lac-**b**)Ac<sub>7</sub> (85%). [ $\alpha$ ]<sup>23</sup><sub>D</sub> -11.6 (*c* 1.0, CH<sub>2</sub>Cl<sub>2</sub>); IR (neat) 1752 cm<sup>-1</sup>; <sup>1</sup>H NMR (400 MHz, CDCl<sub>3</sub>) δ 7.77–7.70 (4 H, m), 7.44–7.40 (3 H, m), 5.32–5.29 (1 H, m), 5.23–5.15 (1 H, m), 5.07–5.00 (2 H, m), 4.96–4.88 (1 H, m), 4.71–4.64 (2 H, m), 4.49–4.41 (2 H, m), 4.30–4.16 (2 H, m), 4.09–3.96 (2 H, m), 3.83–3.80 (1 H, m), 3.72–3.68 (1 H, m), 3.56–3.46 (1 H, m), 2.61–2.60 (3 H, s), 2.09 (3 H, s), 2.02–1.98 (12 H, m), 1.93–1.90 (6 H, m); <sup>13</sup>C NMR (100 MHz, CDCl<sub>3</sub>) δ 170.4, 170.21, 170.16, 170.1, 170.0, 169.8, 169.7, 169.61, 169.57, 169.3, 168.8, 134.3, 134.2, 132.91, 132.87, 127.92, 127.85, 127.76, 127.69, 127.67, 127.5, 126.8, 126.7, 125.9, 125.82, 125.79, 125.76, 101.7, 100.8, 91.96, 91.92, 82.3, 76.1, 75.0, 74.1, 74.0, 73.7, 73.0, 71.1, 70.8, 70.6, 70.4, 69.4, 68.9, 68.5, 68.4, 66.6, 66.5, 62.6, 62.0, 61.5, 60.6, 37.8, 37.7, 20.7, 20.58, 20.55, 20.53, 20.37, 20.35, 20.3; ESI-TOF-HRMS calcd for C<sub>38</sub>H<sub>47</sub>NNaO<sub>18</sub>: 828.2691, found: *m/z* 828.2653 [M + Na]<sup>+</sup>.

***O*-Peracetyl-D-lactose oxime [(Lac-oxime)Ac<sub>8</sub>].** Hydrogenolysis–hydrolysis of (Lac-**a**)Ac<sub>8</sub> afforded (Lac-oxime)Ac<sub>8</sub> (72%) after chromatography (silica gel, CH<sub>2</sub>Cl<sub>2</sub>/MeOH (25:1 to 19:1)). Mp 78–80.4 °C; [ $\alpha$ ]<sup>26</sup><sub>D</sub> +38.7 (*c* 0.7, EtOAc); IR (neat) 3460, 1748 cm<sup>-1</sup>; <sup>1</sup>H NMR (400 MHz, CDCl<sub>3</sub>, *E/Z* isomers = 4:1) δ 9.03 (0.2 H, s), 8.64 (0.8 H, s), 7.39 (0.8 H, d, *J* = 5.7 Hz), 6.57 (0.2 H, d, *J* = 4.9 Hz), 6.05 (0.2 H, t, *J* = 4.3 Hz), 5.77–5.73 (0.8 H, m), 5.56 (0.2 H, t, *J* = 5.5 Hz), 5.47–5.44 (1 H, m), 5.32–5.31 (0.8 H, m), 5.17–5.12 (0.8 H, m), 5.06–5.02 (0.8 H, m), 4.97–4.92 (1 H, m), 4.58–4.54 (1 H, m), 4.48–4.42 (1 H, m), 4.40–4.36 (0.2 H, m), 4.26–4.21 (1 H, m), 4.17–3.99 (3 H, s), 3.86 (0.8 H, t, *J* = 6.3 Hz), 3.81 (0.2 H, t, *J* = 5.3 Hz), 3.61 (0.2 H, t, *J* = 5.3 Hz), 2.13 (2.4 H, s), 2.11 (0.6 H, s), 2.10 (0.6 H, s), 2.03 (6 H, s), 2.02 (6 H, s), 2.00 (5.4 H, s), 1.92 (3 H, s); <sup>13</sup>C NMR (100 MHz, CDCl<sub>3</sub>, *E*-oxime) δ 170.8, 170.4, 170.3, 170.1, 169.8, 169.7, 169.5, 169.3, 146.3, 101.4, 76.0, 71.0 (2 ×), 69.6, 69.5, 68.92, 68.89, 66.9, 61.8, 61.4, 20.73, 20.66, 20.61, 20.56 (4 ×), 20.4; ESI-TOF-HRMS calcd for C<sub>28</sub>H<sub>39</sub>NNaO<sub>19</sub>: 716.2014, found: *m/z* 716.2012 [M + Na]<sup>+</sup>.

**Mannobiose *O*-(naphth-2-ylmethyl)oxime (Man<sub>2</sub>-**a**).** Treatment of D-mannobiose with reagent **a** (method B) afforded Man<sub>2</sub>-**a** (75%) after chromatography (RP-C18, MeOH/H<sub>2</sub>O (1:9 to 1:1)) and lyophilization. Mp 102.5–104 °C; <sup>1</sup>H NMR (400 MHz, D<sub>2</sub>O, *E*-oxime) δ 7.62 (1 H, d, *J* = 6.4 Hz), 7.18–7.15 (3 H, m), 7.13 (1 H, d, *J* = 7.9 Hz), 7.02 (1 H, d, *J* = 6.7 Hz), 6.90–6.82 (2 H, m), 4.86 (2 H, s), 4.68 (1 H, s), 4.54 (1 H, dd, *J* = 8.9, 6.8 Hz), 4.06–4.03 (2 H, m), 3.90–3.80 (4 H, m), 3.67–3.58 (3 H, m), 3.54–3.50 (1 H, m), 3.29–3.25 (1 H, m); <sup>13</sup>C NMR (100 MHz, D<sub>2</sub>O, *E*-oxime) δ 152.6, 133.8, 132.7, 132.5, 127.9, 127.7, 127.3, 127.1, 125.9, 125.8 (2 ×), 100.0, 76.9, 75.9, 75.6, 72.9, 70.8, 70.7, 70.6, 68.0, 67.0, 62.3, 61.2; ESI-TOF-HRMS (negative mode) calcd for C<sub>23</sub>H<sub>30</sub>NO<sub>11</sub>: 496.1819, found: *m/z* 496.1814 [M – H]<sup>-</sup>.



**Mannopentaose *O*-(naphth-2-ylmethyl)oxime (Man<sub>5</sub>-a).** Treatment of D-mannopentaose with reagent **a** (method B) afforded Man<sub>5</sub>-a (64%). Mp 168–170.3 °C; <sup>1</sup>H NMR (400 MHz, D<sub>2</sub>O) δ 7.74–7.66 (5 H, m), 7.41–7.38 (3 H, m), 5.16 (2 H, s), 4.73 (2 H, s), 4.67 (1 H, s), 4.57 (1 H, s), 4.53 (1 H, t, *J* = 7.4 Hz), 4.13–3.25 (29 H, m); <sup>13</sup>C NMR (100 MHz, D<sub>2</sub>O) δ 153.2, 134.7, 133.0, 132.9, 128.4, 128.1, 127.8, 127.4, 126.7 (2 ×), 126.3, 100.4, 100.3, 100.2, 99.9, 77.3, 76.83, 76.79, 76.6, 76.5, 75.8, 75.2, 75.1, 74.8, 72.9, 71.7, 71.64, 71.59, 70.8 (2 ×), 70.7 (2 ×) 70.3, 70.1, 68.4, 66.9, 62.5, 61.2, 60.8, 60.7, 60.6; HRMS-ESI (negative mode) calcd for C<sub>41</sub>H<sub>60</sub>NO<sub>26</sub>: 982.3404, found: *m/z* 982.3437 [M – H]<sup>–</sup>.

***N*-Methyl-*N*-(naphth-2-ylmethoxy)maltohexaosylamine (Glc<sub>6</sub>-b).** Treatment of D-maltohexaose with reagent **b** (method D) afforded Glc<sub>6</sub>-b (76%) after chromatography (RP-C18, H<sub>2</sub>O/MeOH (20:1 to 1:1)) and lyophilization. Mp 188.5–192 °C; <sup>1</sup>H NMR (400 MHz, D<sub>2</sub>O) δ 7.97–7.95 (4 H, m), 7.61–7.58 (3 H, m), 5.38–5.35 (5 H, m), 4.97 (2 H, s), 4.12 (1 H, d, *J* = 8 Hz), 4.01–3.55 (33 H, m), 3.42 (1 H, t, *J* = 8 Hz), 3.35–3.33 (1 H, m), 2.81 (3 H); <sup>13</sup>C NMR (100 MHz, D<sub>2</sub>O) δ 133.6, 132.91, 132.85, 128.4, 128.3, 128.0, 127.7, 127.1, 126.7, 126.6, 99.8 (3 ×), 99.6 (2 ×), 93.0, 77.4, 77.2 (3 ×), 76.9 (2 ×), 75.7 (2 ×), 75.3 (2 ×), 73.3 (3 ×), 72.9 (2 ×), 72.7 (2 ×), 71.7 (2 ×), 71.5 (2 ×), 71.1 (2 ×), 69.7, 69.3, 60.3 (6 ×), 38.8; ESI-TOF-HRMS calcd for C<sub>48</sub>H<sub>73</sub>NNaO<sub>31</sub>: 1182.4064, found: *m/z* 1182.4084 [M + Na]<sup>+</sup>.

**Maltoheptaose *O*-(naphth-2-ylmethyl)oxime (Glc<sub>7</sub>-a).** Treatment of D-maltoheptaose with reagent **a** (method B) afforded Glc<sub>7</sub>-a (73%). Mp 207–210 °C; [α]<sub>D</sub><sup>20</sup> +137 (*c* 0.1, H<sub>2</sub>O); <sup>1</sup>H NMR (600 MHz, D<sub>2</sub>O, *E/Z*-isomers = 4:1) δ 7.98–7.93 (4 H, m), 7.69 (0.8 H, d, *J* = 5.2 Hz), 7.62–7.60 (3 H, m), 6.99 (0.2 H, d, *J* = 4 Hz), 5.39–5.37 (2 H, m), 5.34–5.32 (2 H, m), 5.30 (1 H, s), 5.28–5.27 (2 H, m), 5.26–5.24 (1 H, m), 4.57 (0.8 H, t, *J* = 2.4 Hz), 4.39 (1 H, t, *J* = 5.6 Hz), 4.27 (0.2 H, d, *J* = 6 Hz), 4.04–3.09 (40 H, m); <sup>13</sup>C NMR (100 MHz, D<sub>2</sub>O, *E/Z*-isomers) δ 152.0/153.4, 135.3/134.2, 132.89, 132.86, 128.4, 128.0, 127.7, 127.5, 126.7, 126.6, 126.5, 100.5, 100.4, 100.2, 100.12, 100.07, 99.8, 78.6, 78.5, 78.3, 78.0, 77.9, 77.4, 77.1, 76.9, 76.8, 76.7, 75.6, 75.5, 73.4, 73.3, 73.0, 72.8, 72.7, 71.8, 71.71, 71.65, 71.59, 71.54, 71.45, 71.31, 71.25, 71.20, 71.0, 70.9, 69.7, 69.3, 61.9, 60.5, 60.43, 60.36, 60.3, 60.2; ESI-TOF-HRMS calcd for C<sub>53</sub>H<sub>81</sub>NNaO<sub>36</sub>: 1330.4436, found: *m/z* 1330.4446 [M + Na]<sup>+</sup>.

***N*-Methyl-*N*-(naphth-2-ylmethoxy)maltoheptaosylamine (Glc<sub>7</sub>-b).** Treatment of D-maltoheptaose with reagent **b** (method D) afforded Glc<sub>7</sub>-b (68%). Mp 206–209 °C; <sup>1</sup>H NMR (400 MHz, D<sub>2</sub>O) δ 7.99–7.97 (4 H, m), 7.62–7.59 (3 H, m), 5.40–5.39 (6 H, m), 4.99 (2 H, s), 4.17 (1 H, d, *J* = 8 Hz), 4.01–3.37 (41 H, m), 2.82 (3 H); <sup>13</sup>C NMR (100 MHz, D<sub>2</sub>O) δ 134.8, 133.7, 132.9, 128.4, 128.3, 127.9, 127.7, 127.1, 126.7, 126.6, 99.72 (2 ×), 99.62 (4 ×), 93.1, 77.4, 76.9 (4 ×), 75.8 (3 ×), 75.3 (3 ×), 73.3 (3 ×), 72.8 (2 ×), 72.7 (2 ×), 71.5 (4 ×), 71.2 (3 ×), 69.8 (2 ×), 69.3 (2 ×), 60.4 (7 ×), 38.9; ESI-TOF-HRMS calcd for C<sub>54</sub>H<sub>83</sub>NNaO<sub>6</sub>: 1344.4592, found: *m/z* 1344.4595 [M + Na]<sup>+</sup>.

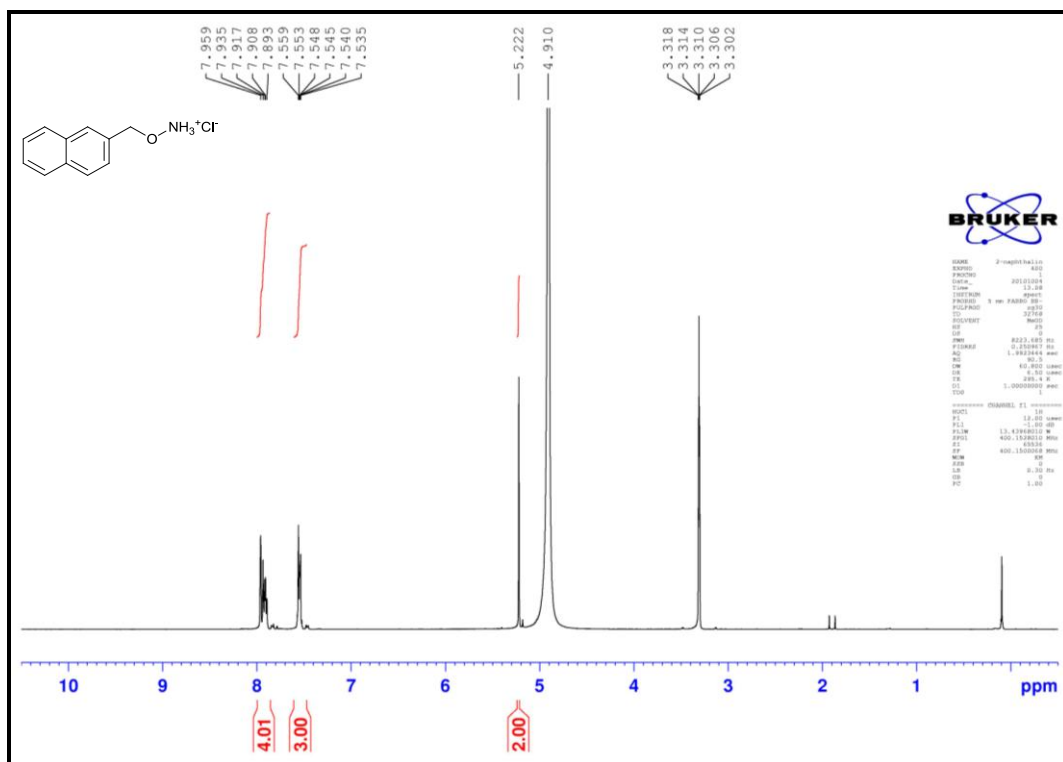

<sup>1</sup>H NMR spectrum of reagent a (400 MHz, CD<sub>3</sub>OD)

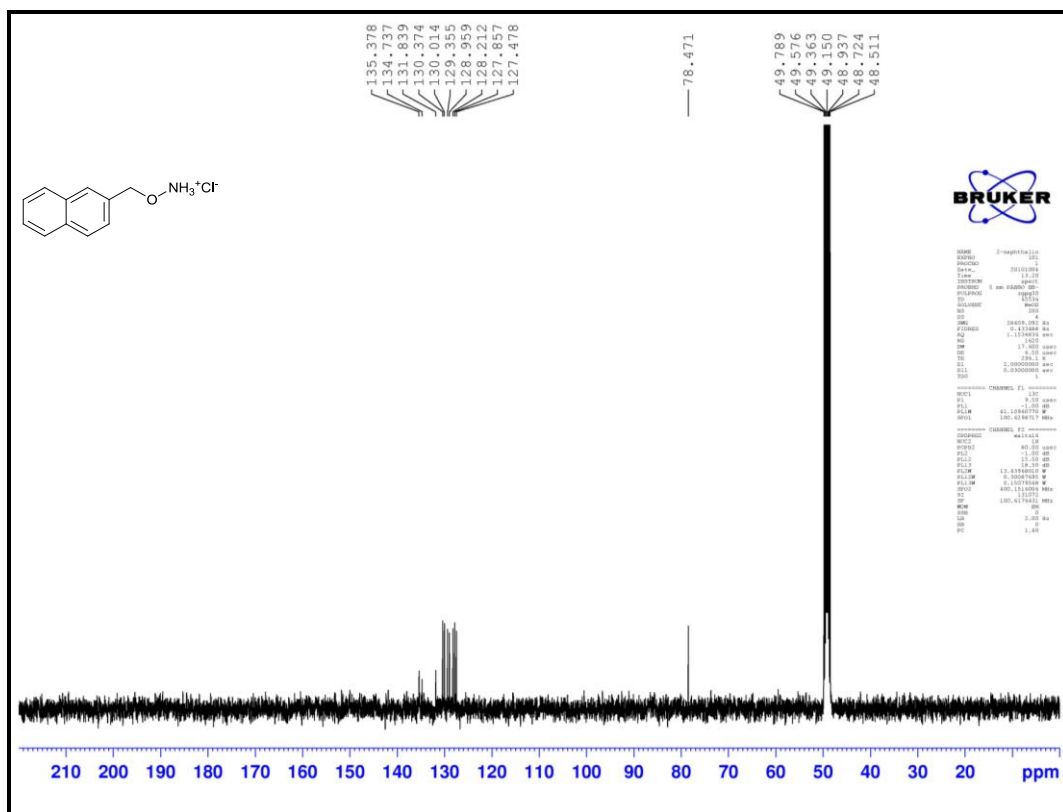

<sup>13</sup>C NMR spectrum of reagent a (100 MHz, CD<sub>3</sub>OD)

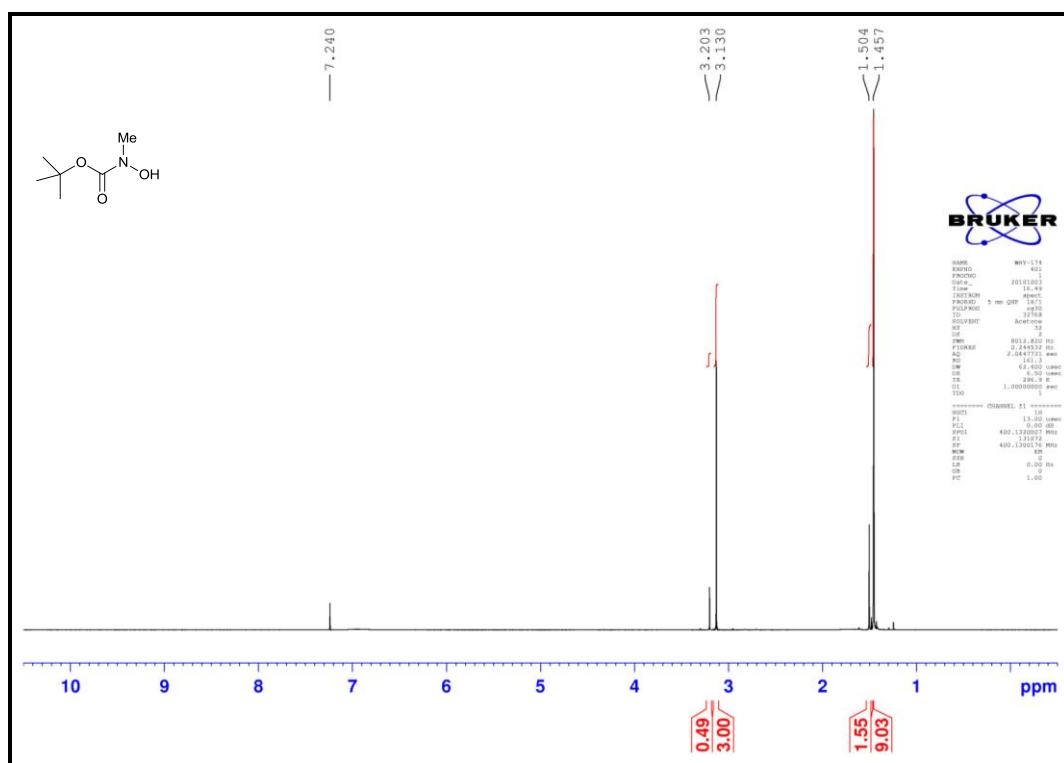

<sup>1</sup>H NMR spectrum of *O*-(*tert*-butyl)-*N*-hydroxy-*N*-methyl carbamate (400 MHz, CDCl<sub>3</sub>)

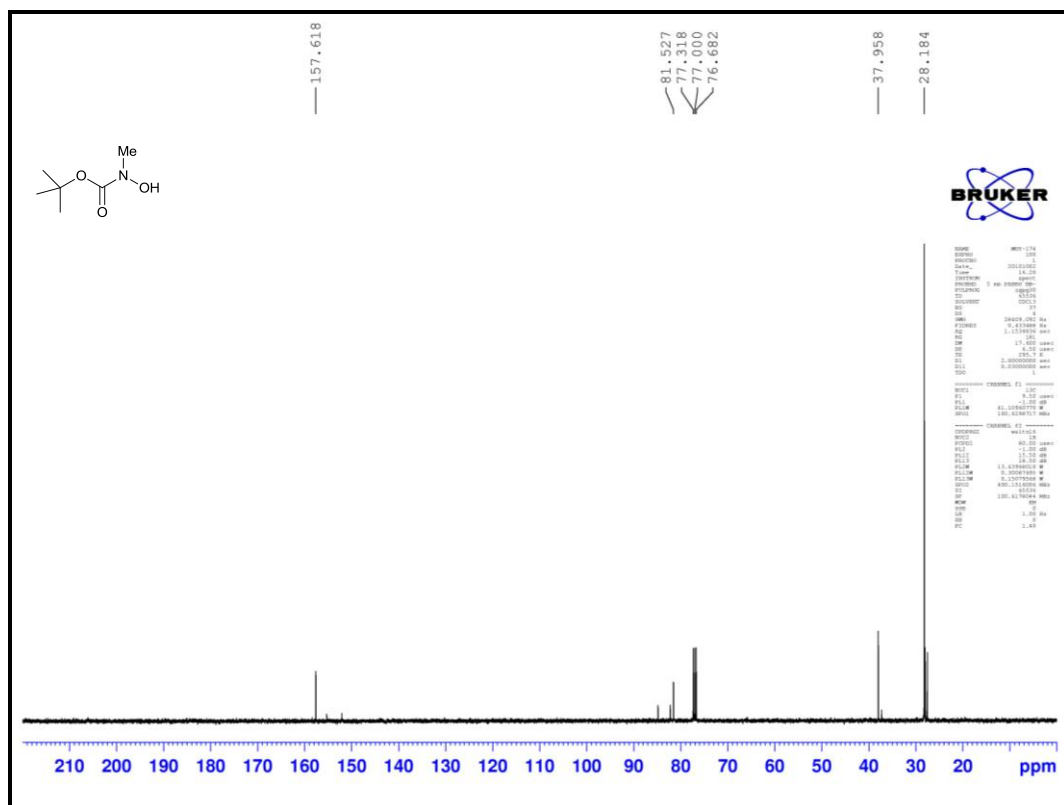

<sup>13</sup>C NMR spectrum of *O*-(*tert*-butyl)-*N*-hydroxy-*N*-methyl carbamate (100 MHz, CDCl<sub>3</sub>)

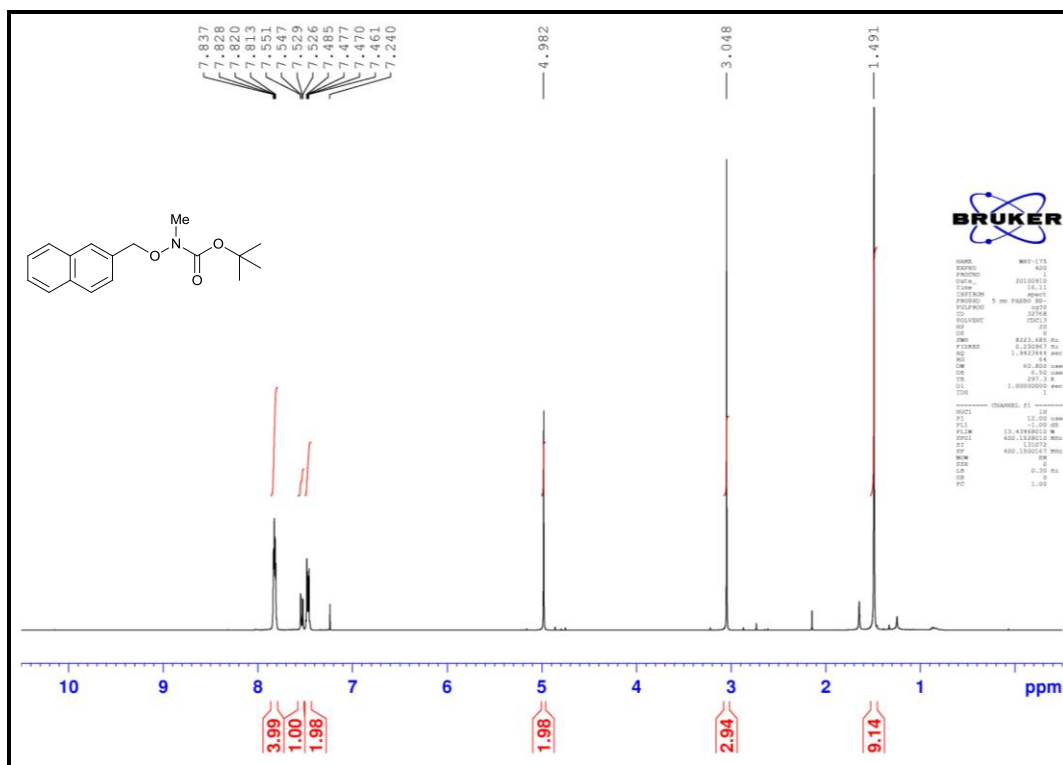

<sup>1</sup>H NMR spectrum of *O*-(*tert*-butyl)-*N*-methyl-*N*-(naphtha-2-ylmethoxy) carbamate (400 MHz, CDCl<sub>3</sub>)

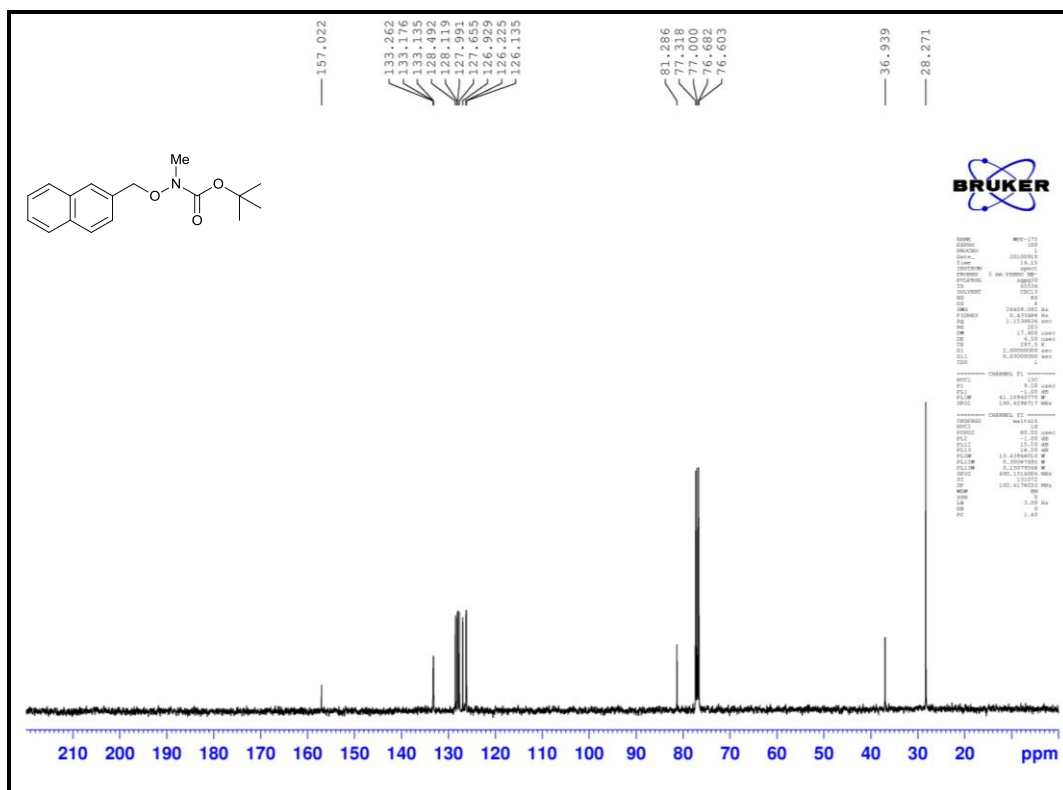

<sup>13</sup>C NMR spectrum of *O*-(*tert*-butyl)-*N*-methyl-*N*-(naphtha-2-ylmethoxy) carbamate (100 MHz, CDCl<sub>3</sub>)

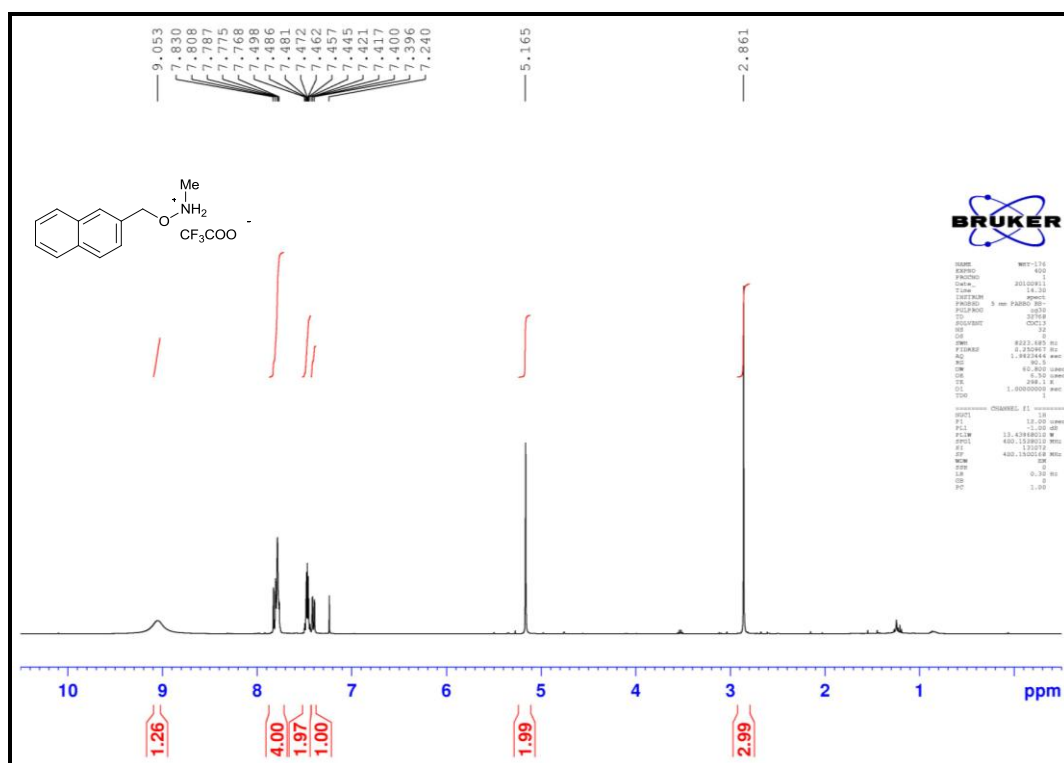

<sup>1</sup>H NMR spectrum of reagent **b** (400 MHz, CDCl<sub>3</sub>)

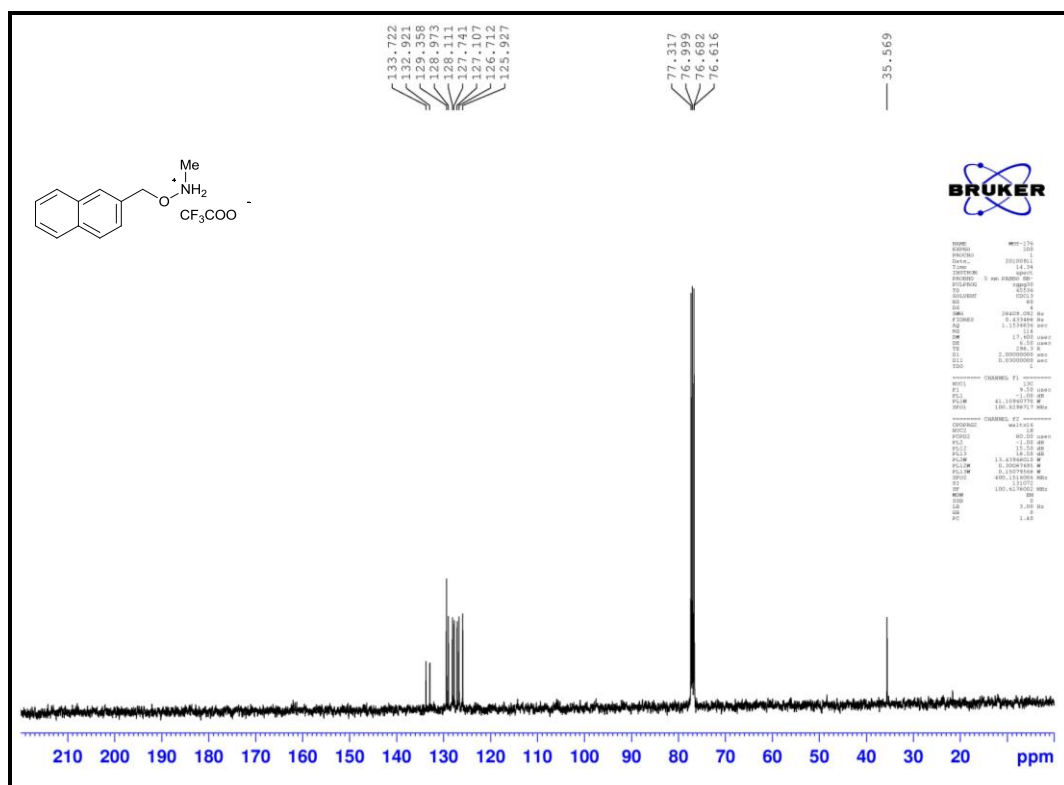

<sup>13</sup>C NMR spectrum of reagent **b** (100 MHz, CDCl<sub>3</sub>)

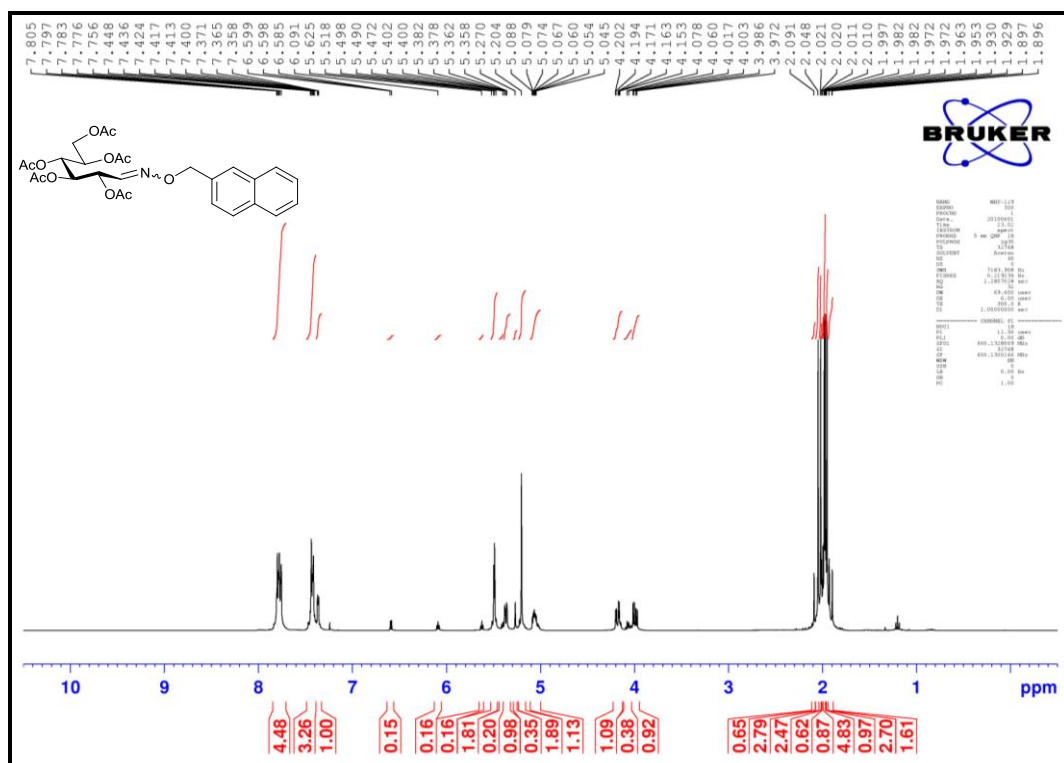

$^1\text{H}$  NMR spectrum of (Glc-a)Ac<sub>5</sub> (400 MHz, CDCl<sub>3</sub>, a mixture of *E/Z* isomers (4:1))

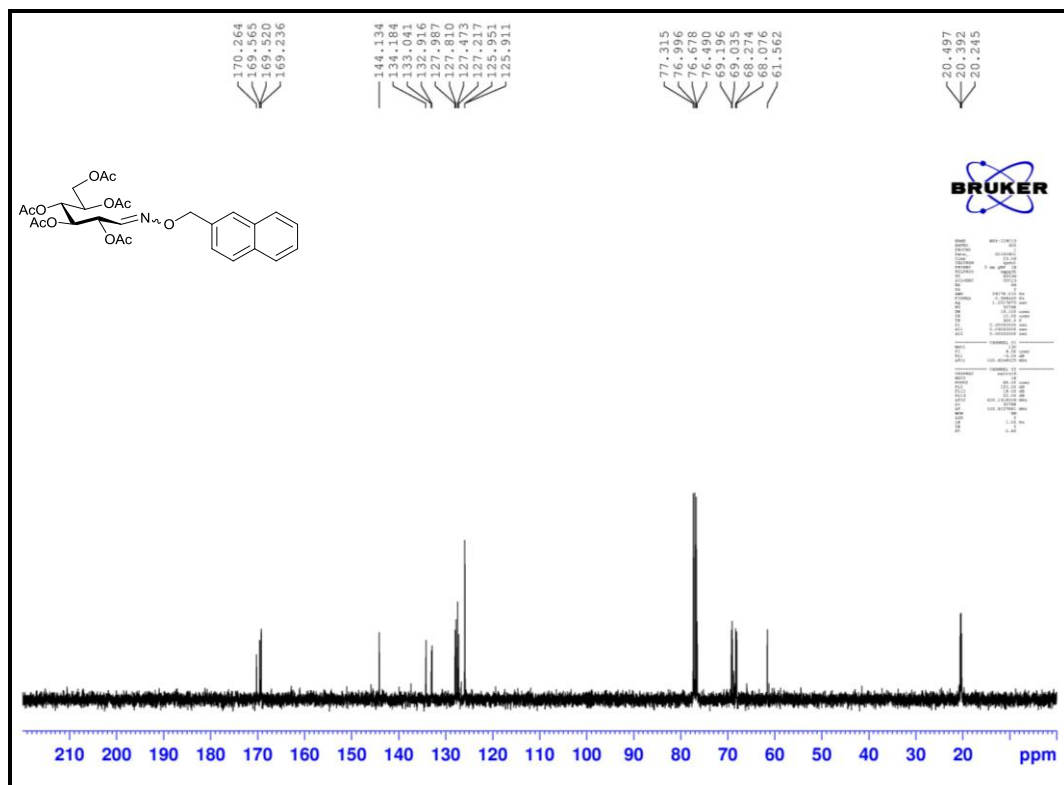

$^{13}\text{C}$  NMR spectrum of (Glc-a)Ac<sub>5</sub> (100 MHz, CDCl<sub>3</sub>, a mixture of *E/Z* isomers (4:1))



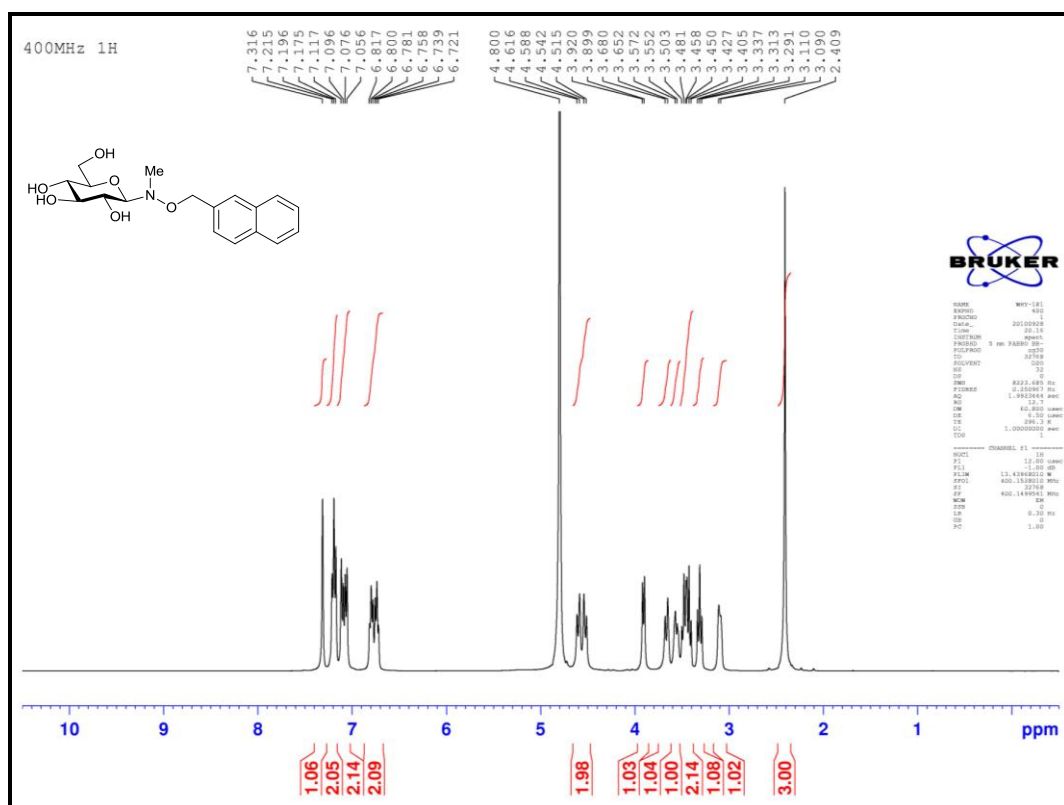

$^1\text{H}$  NMR spectrum of Glc-**b** (400 MHz,  $\text{D}_2\text{O}$ )

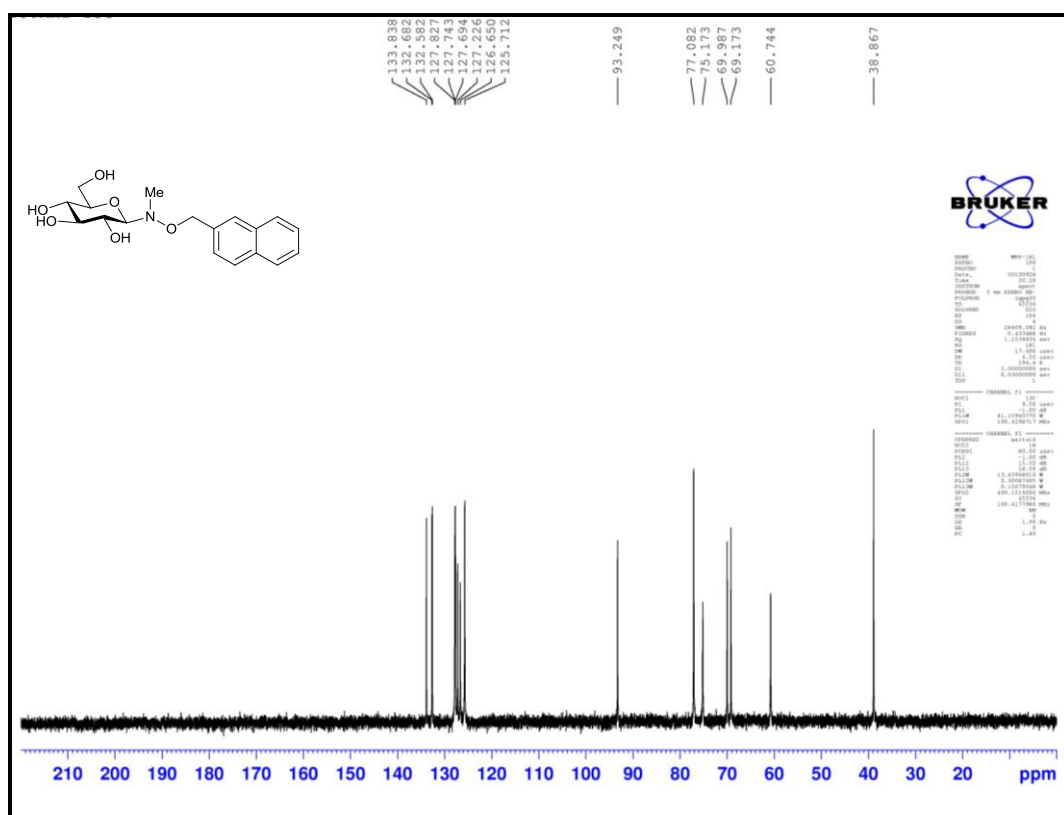

$^{13}\text{C}$  NMR spectrum of Glc-**b** (100 MHz,  $\text{D}_2\text{O}$ )

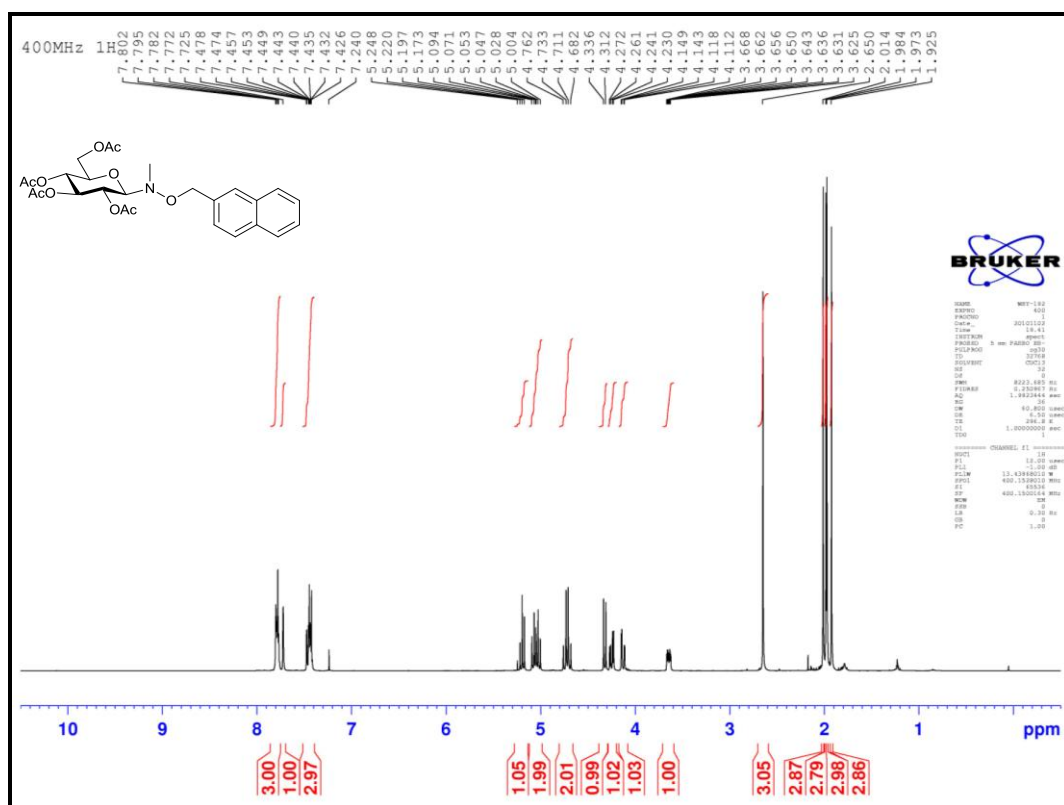

<sup>1</sup>H NMR spectrum of (Glc-b)Ac<sub>4</sub> (400 MHz, CDCl<sub>3</sub>)

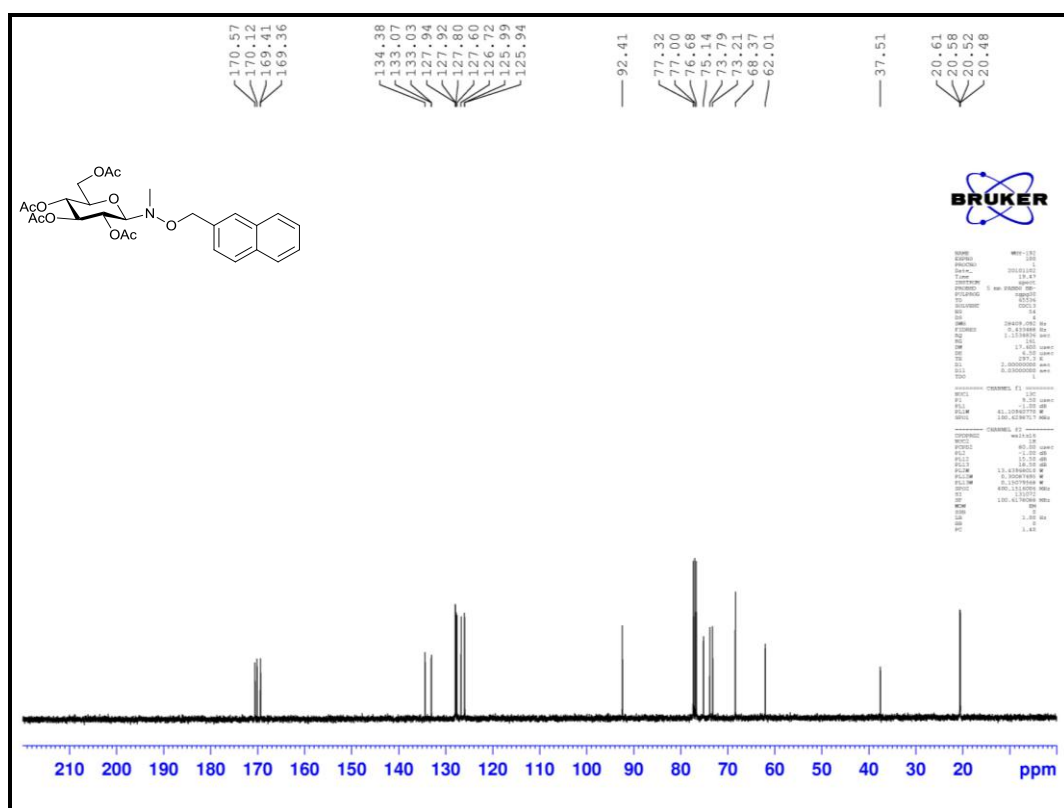

<sup>13</sup>C NMR spectrum of (Glc-b)Ac<sub>4</sub> (100 MHz, CDCl<sub>3</sub>)

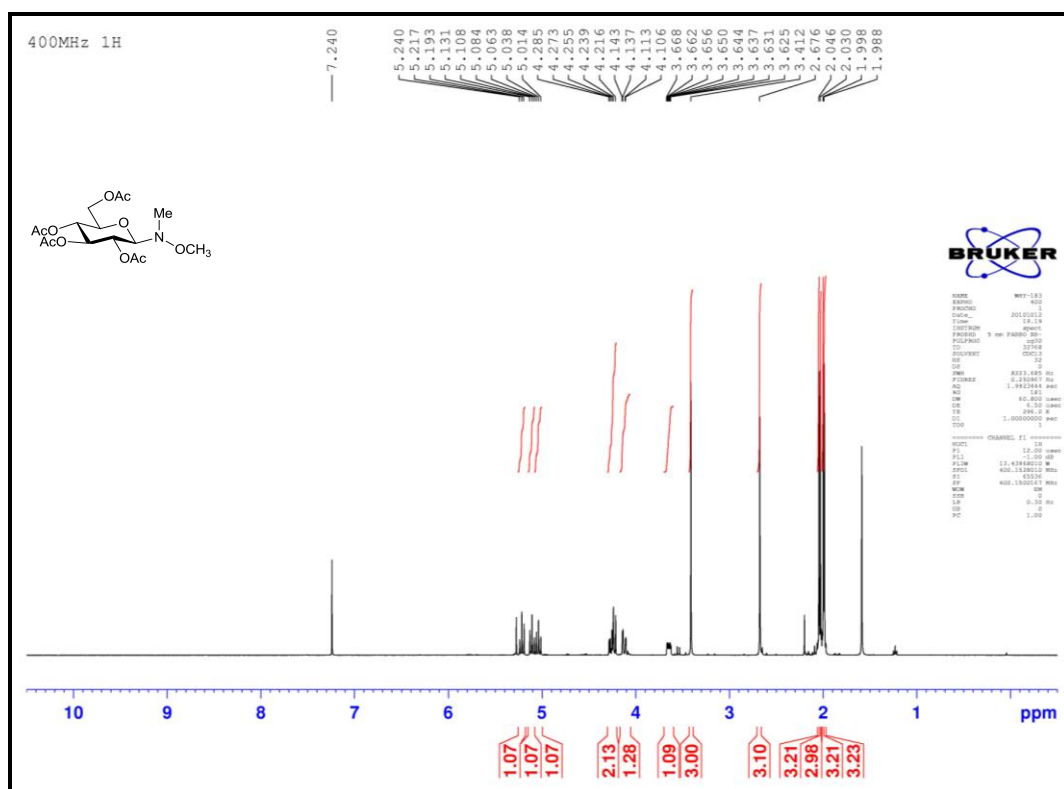

<sup>1</sup>H NMR spectrum of *N*-Methyl-*N*-methoxy-β-2,3,4,6-tetraacetyl-D-glucosylamine (400 MHz, CDCl<sub>3</sub>)

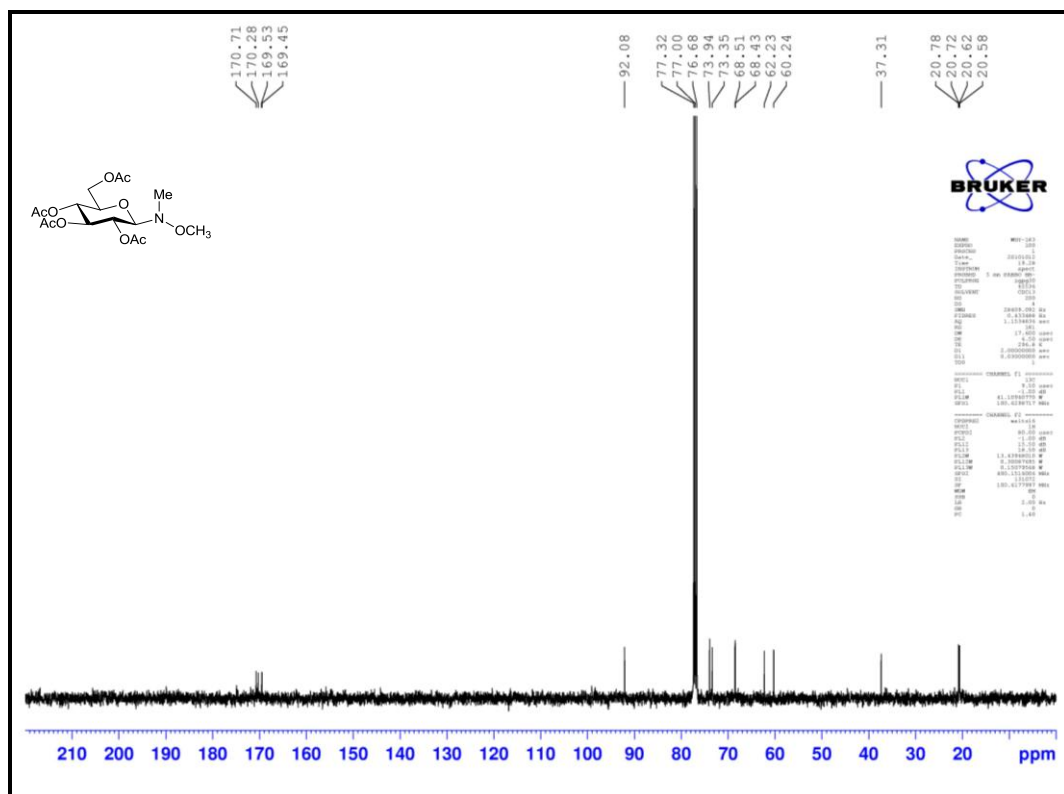

<sup>13</sup>C NMR spectrum of *N*-Methyl-*N*-methoxy-β-2,3,4,6-tetraacetyl-D-glucosylamine (100 MHz, CDCl<sub>3</sub>)

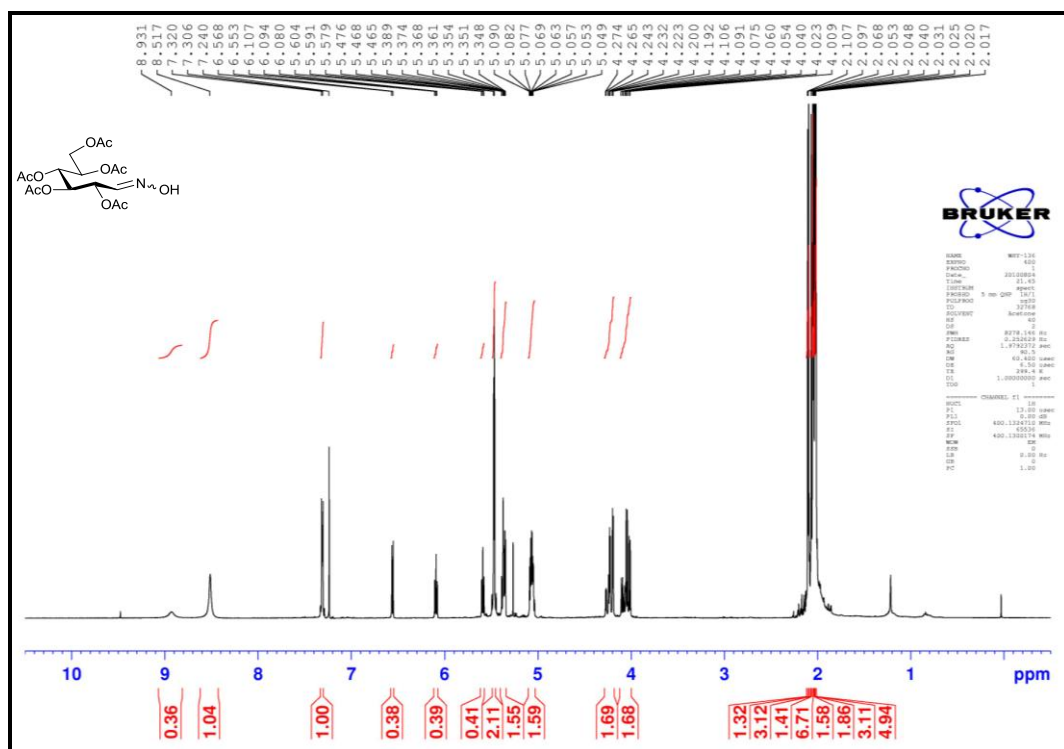

<sup>1</sup>H NMR spectrum of (Glc-oxime)Ac<sub>5</sub> (400 MHz, CDCl<sub>3</sub>, a mixture of *E/Z* isomers (7:3))

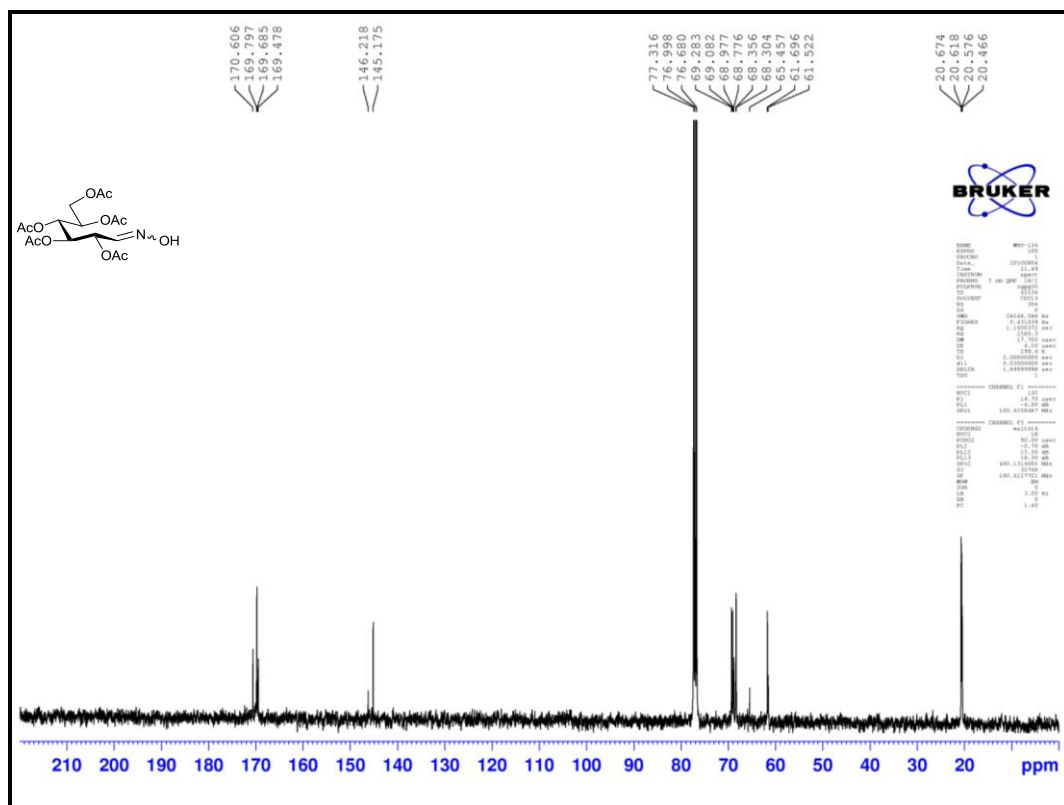

<sup>13</sup>C NMR spectrum of (Glc-oxime)Ac<sub>5</sub> (100 MHz, CDCl<sub>3</sub>, a mixture of *E/Z* isomers (7:3))

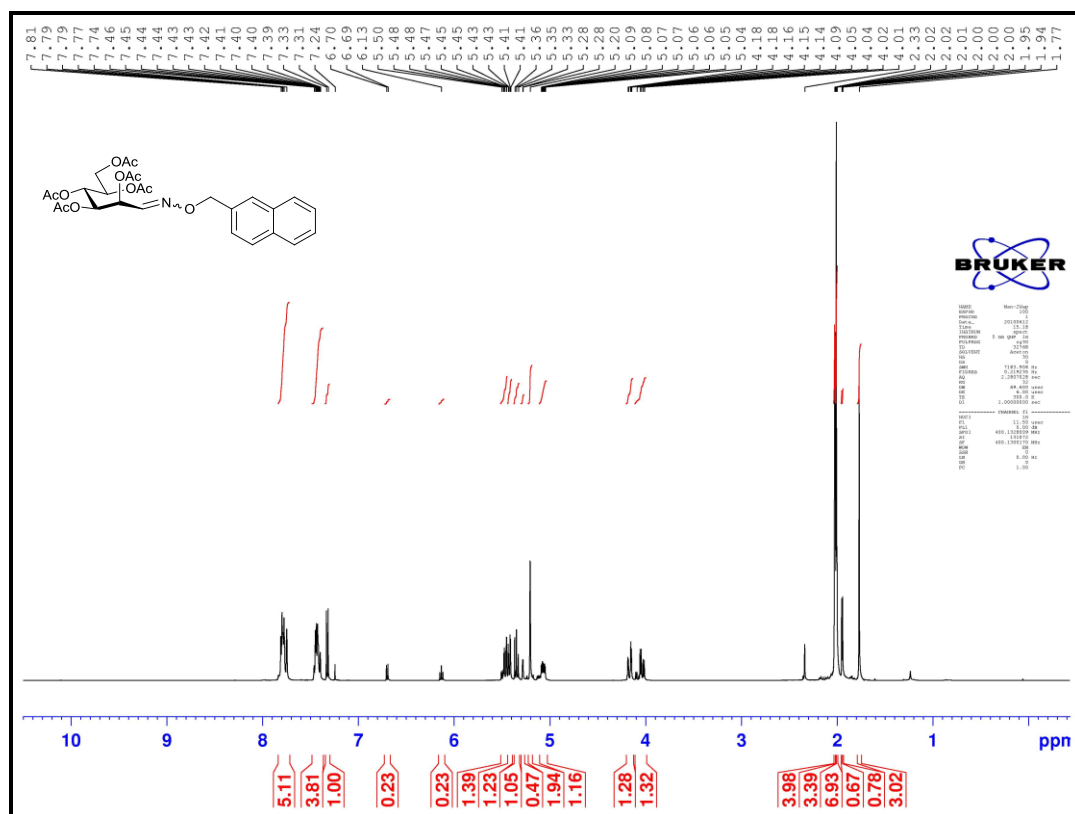

<sup>1</sup>H NMR spectrum of (Man-a)Ac<sub>5</sub> (400 MHz, CDCl<sub>3</sub>, a mixture of *E/Z* isomers (4:1))

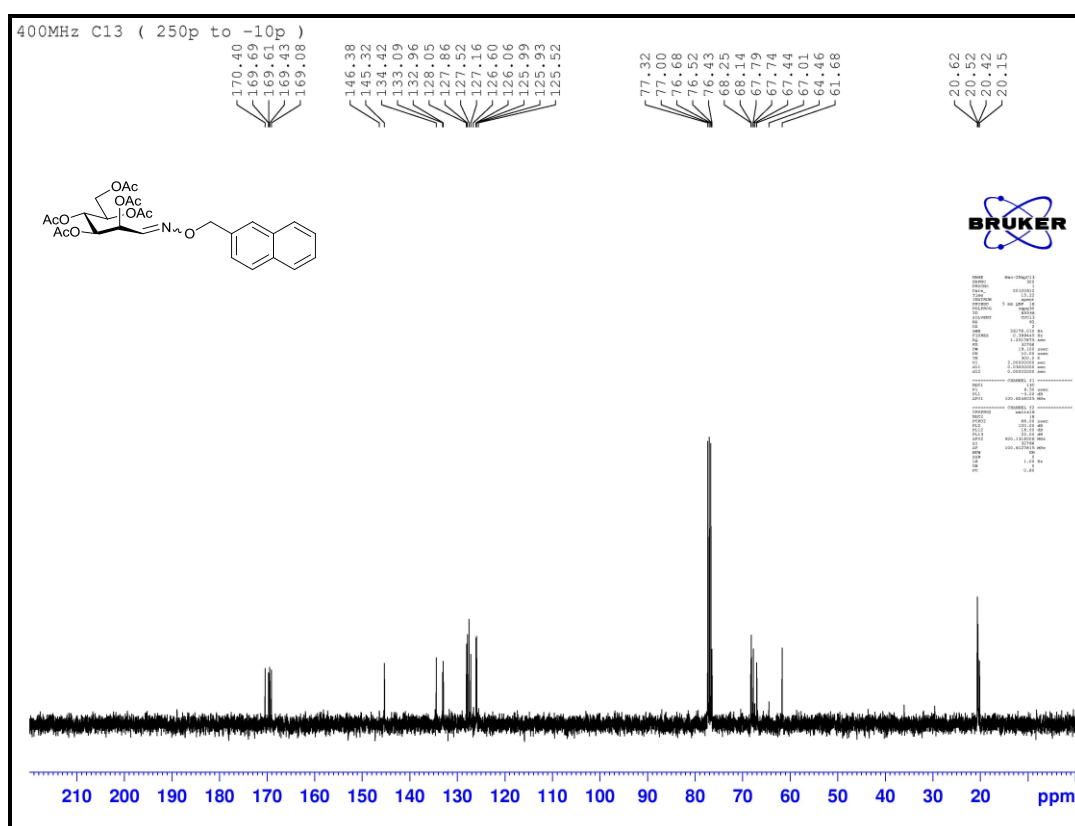

<sup>13</sup>C NMR spectrum of (Man-a)Ac<sub>5</sub> (100 MHz, CDCl<sub>3</sub>, a mixture of *E/Z* isomers (4:1))

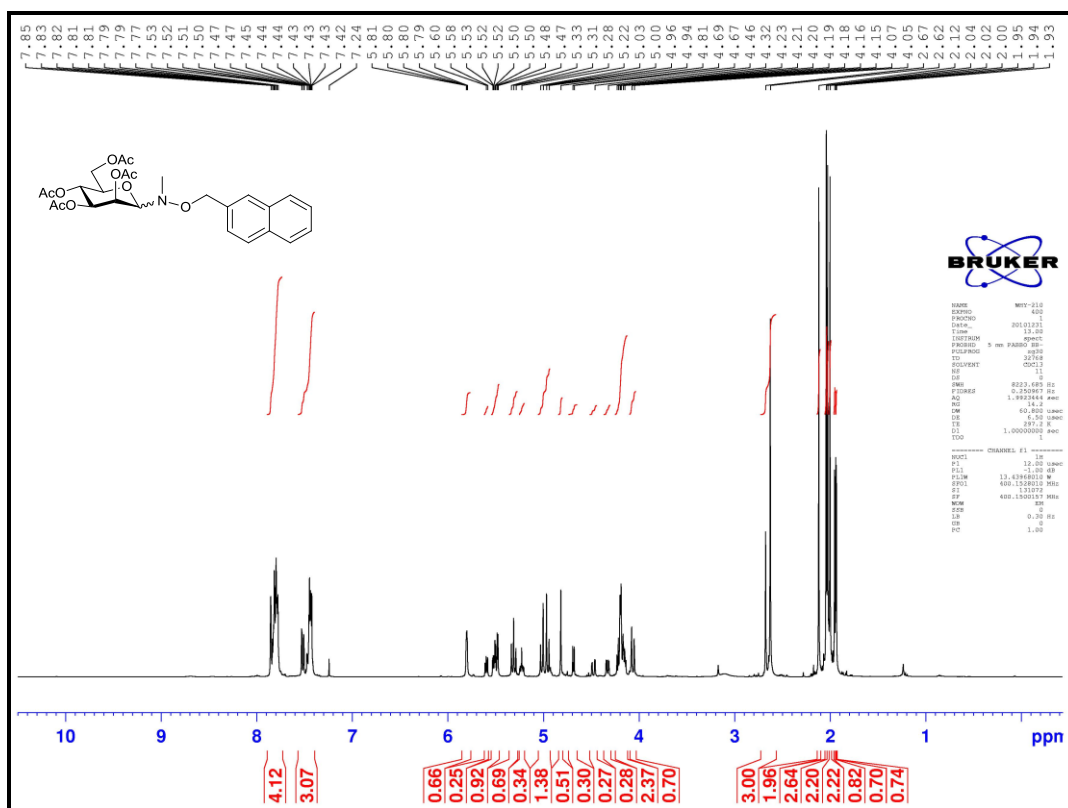

<sup>1</sup>H NMR spectrum of (Man-**b**)Ac<sub>4</sub> (400 MHz, CDCl<sub>3</sub>, α/β anomers (2:1))

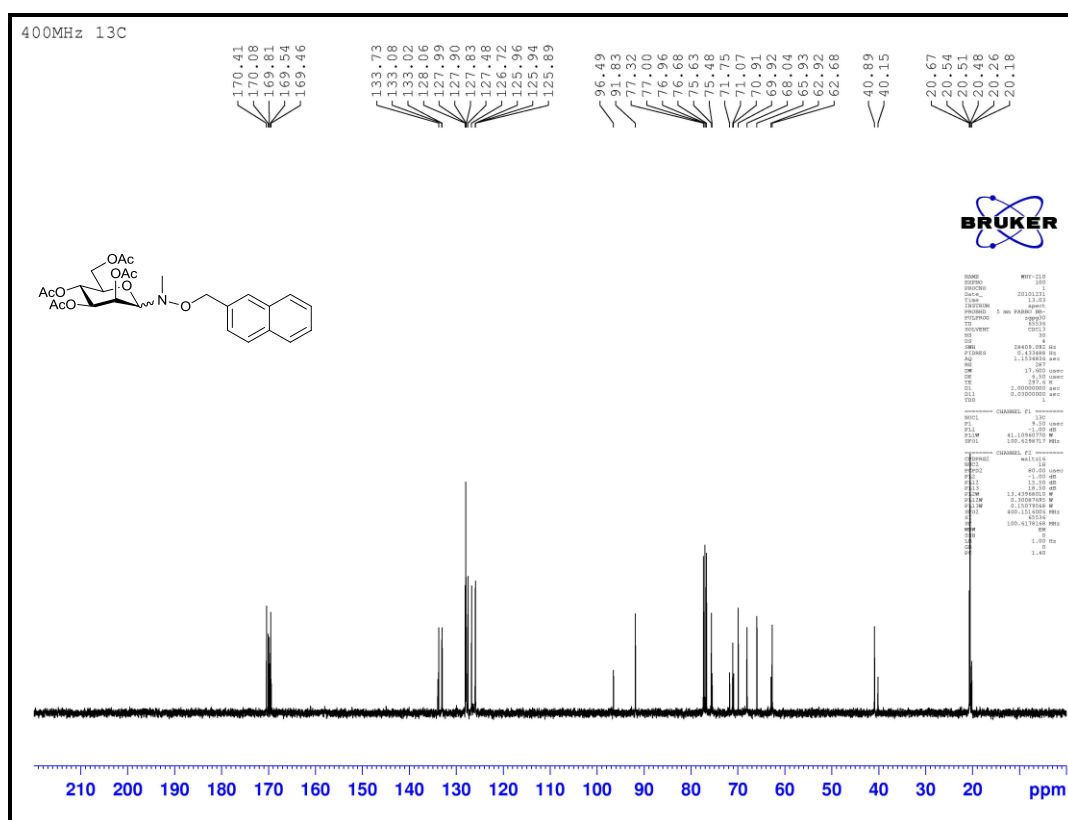

<sup>13</sup>C NMR spectrum of (Man-**b**)Ac<sub>4</sub> (100 MHz, CDCl<sub>3</sub>, α/β anomers (2:1))



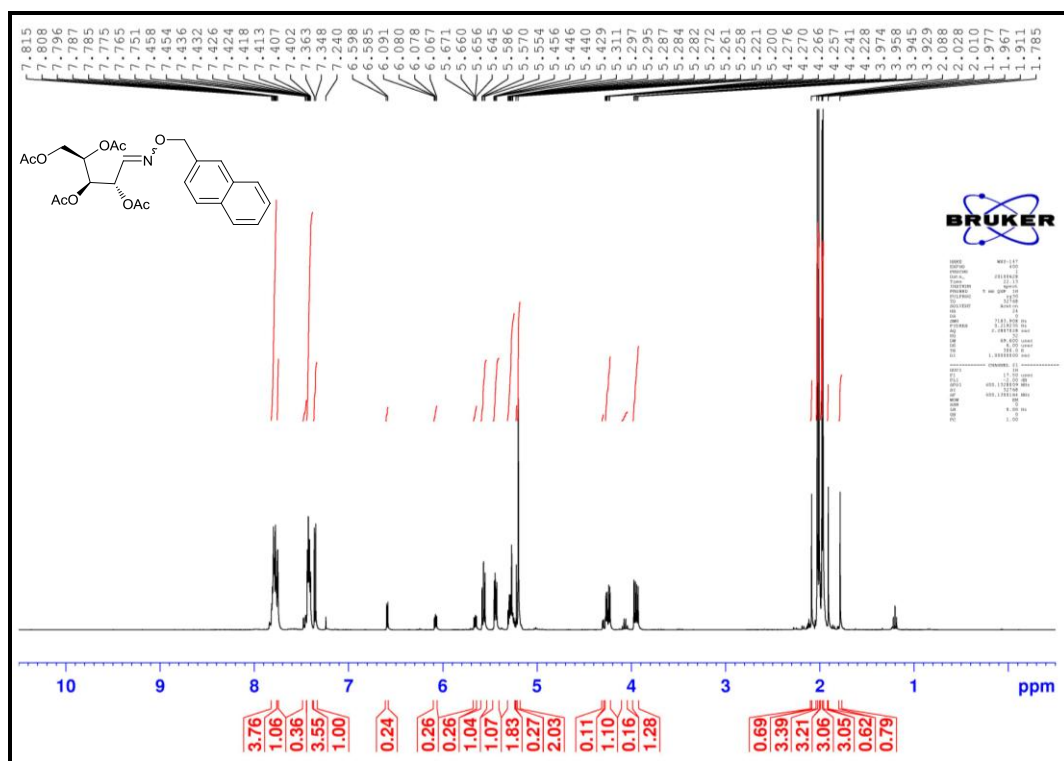

<sup>1</sup>H NMR spectrum of (Xyl-a)Ac<sub>4</sub> (400 MHz, CDCl<sub>3</sub>, a mixture of *E/Z* isomers (4:1))

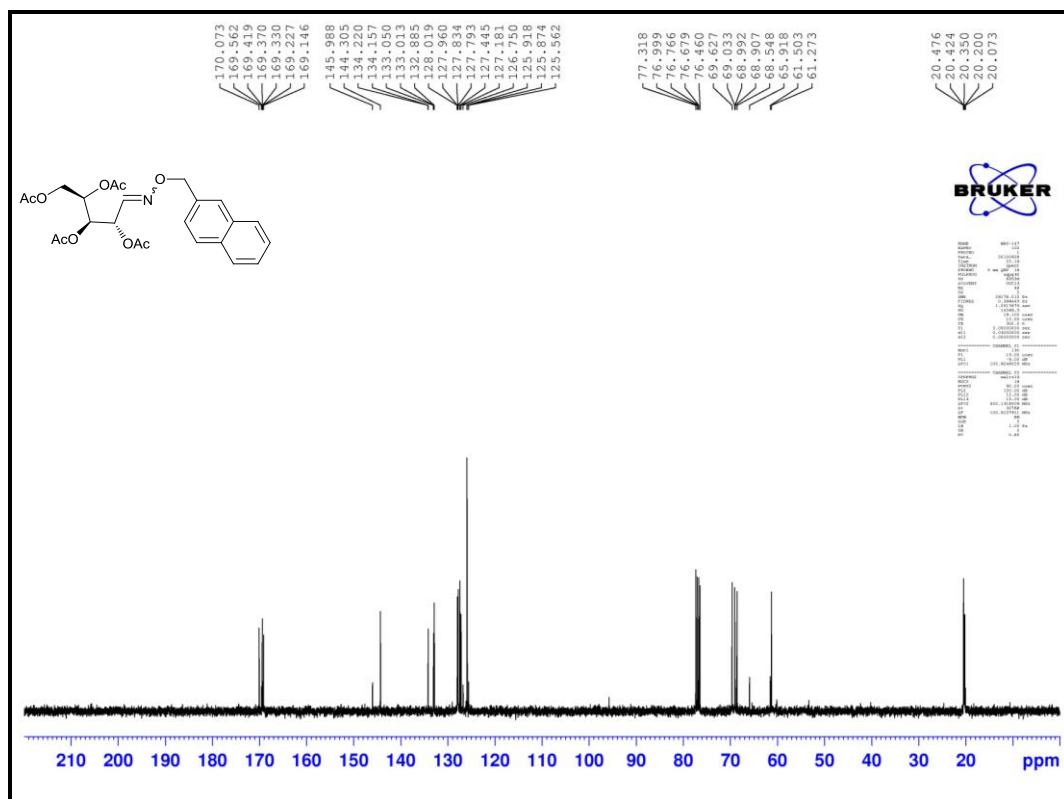

<sup>13</sup>C NMR spectrum of (Xyl-a)Ac<sub>4</sub> (100 MHz, CDCl<sub>3</sub>, a mixture of *E/Z* isomers (4:1))

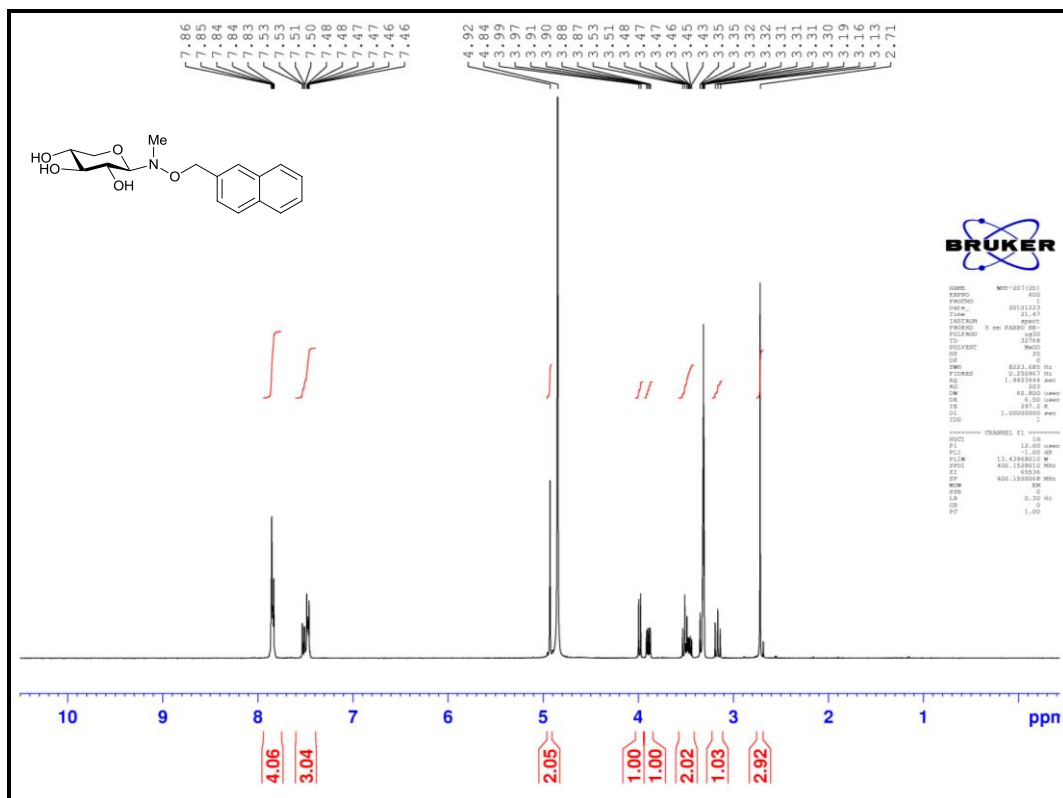

<sup>1</sup>H NMR spectrum of Xyl-b (400 MHz, CD<sub>3</sub>OD)

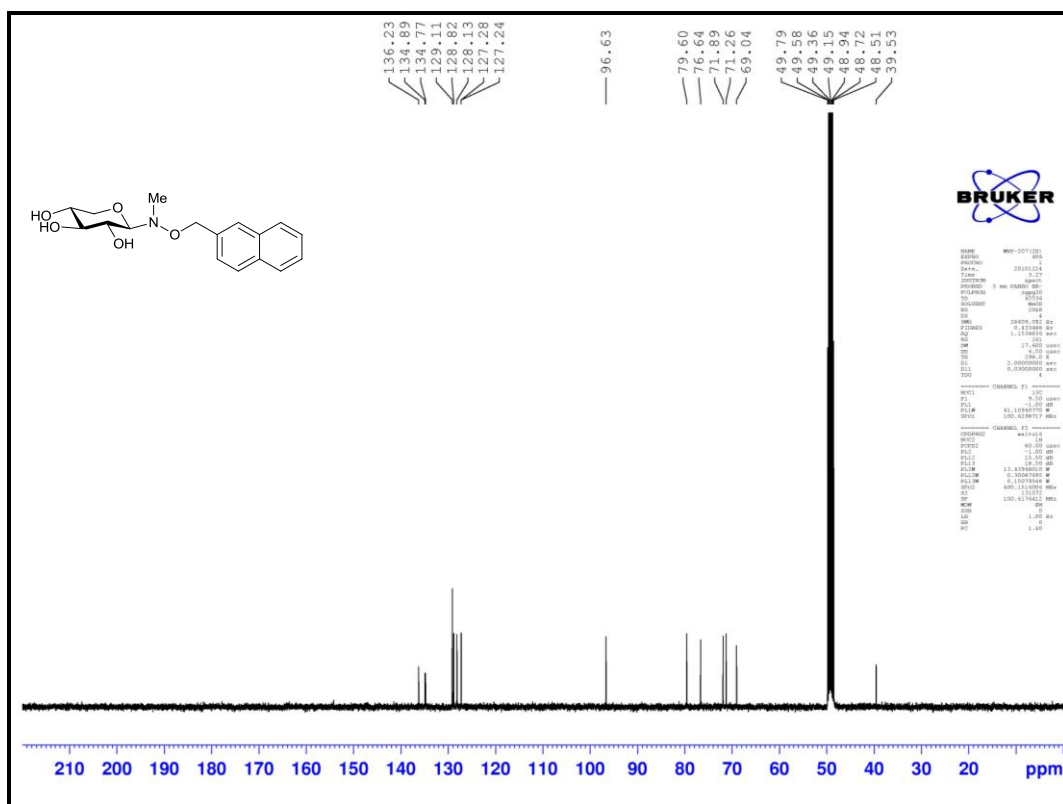

<sup>13</sup>C NMR spectrum of Xyl-b (100 MHz, CD<sub>3</sub>OD)

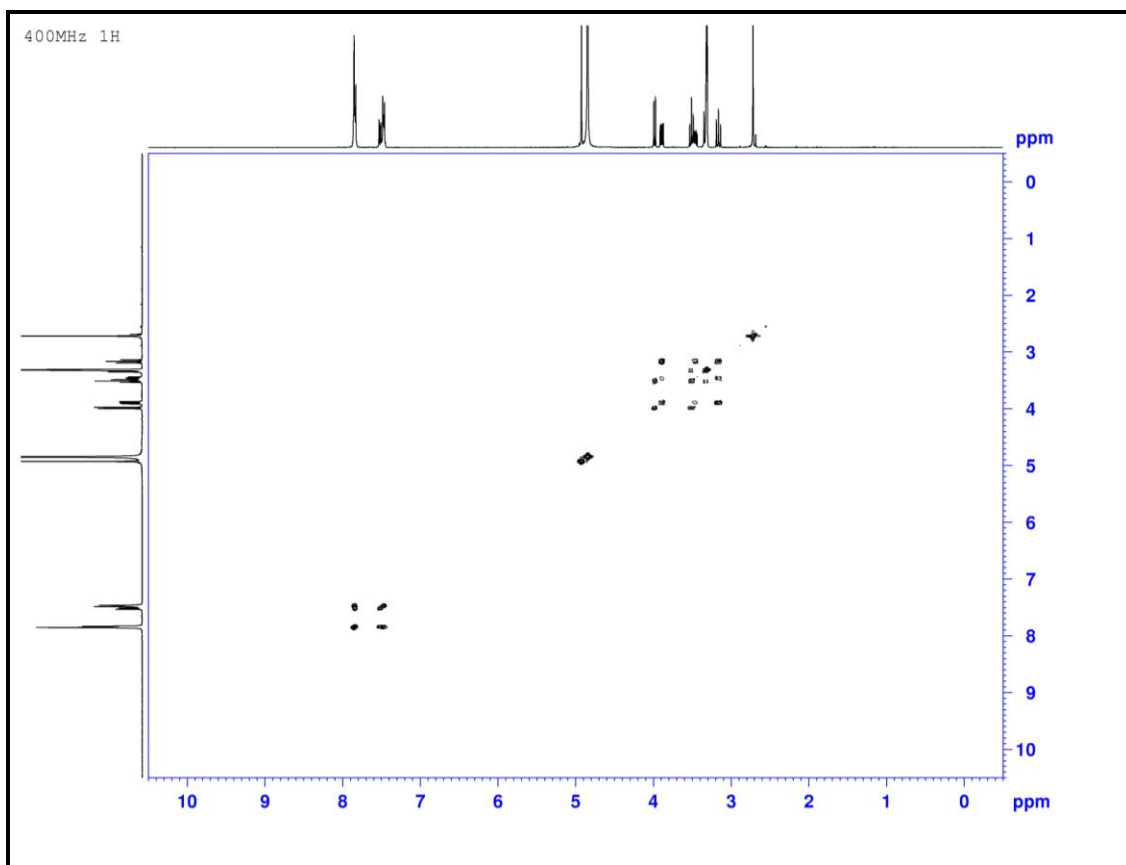

$^1\text{H}$ - $^1\text{H}$  COSY NMR spectrum of Xyl-**b** (400 MHz,  $\text{CD}_3\text{OD}$ ).

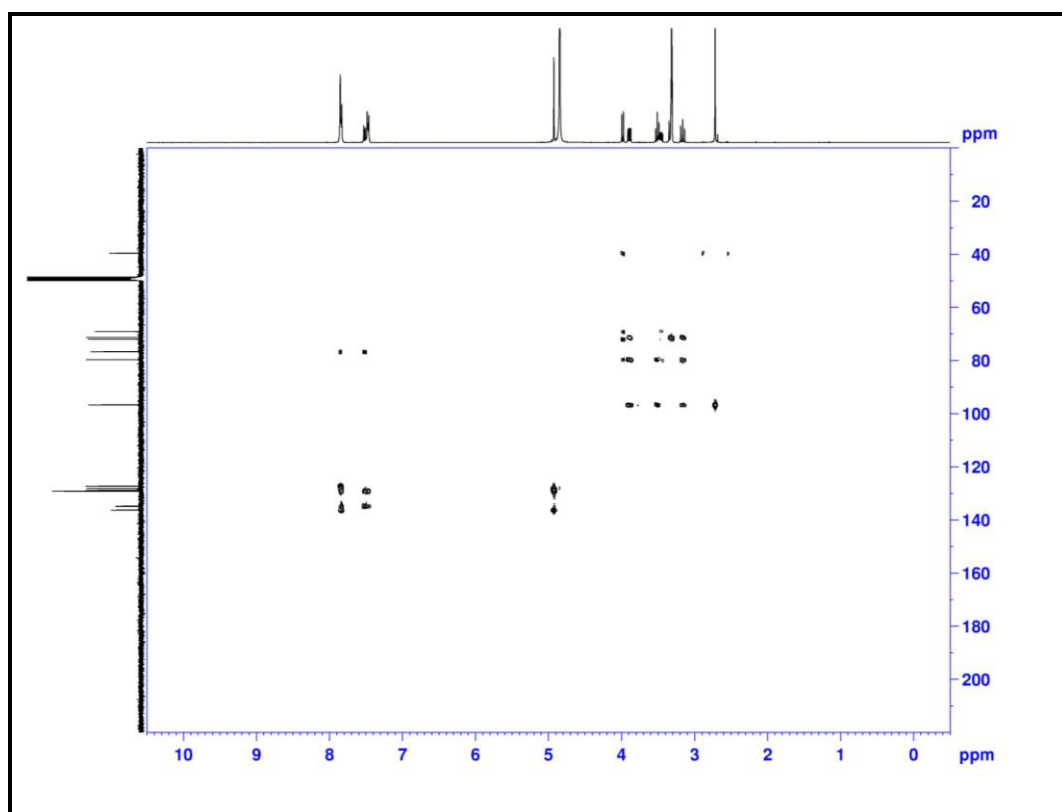

HMBC NMR spectrum of Xyl-**b** (400 MHz,  $\text{CD}_3\text{OD}$ ).

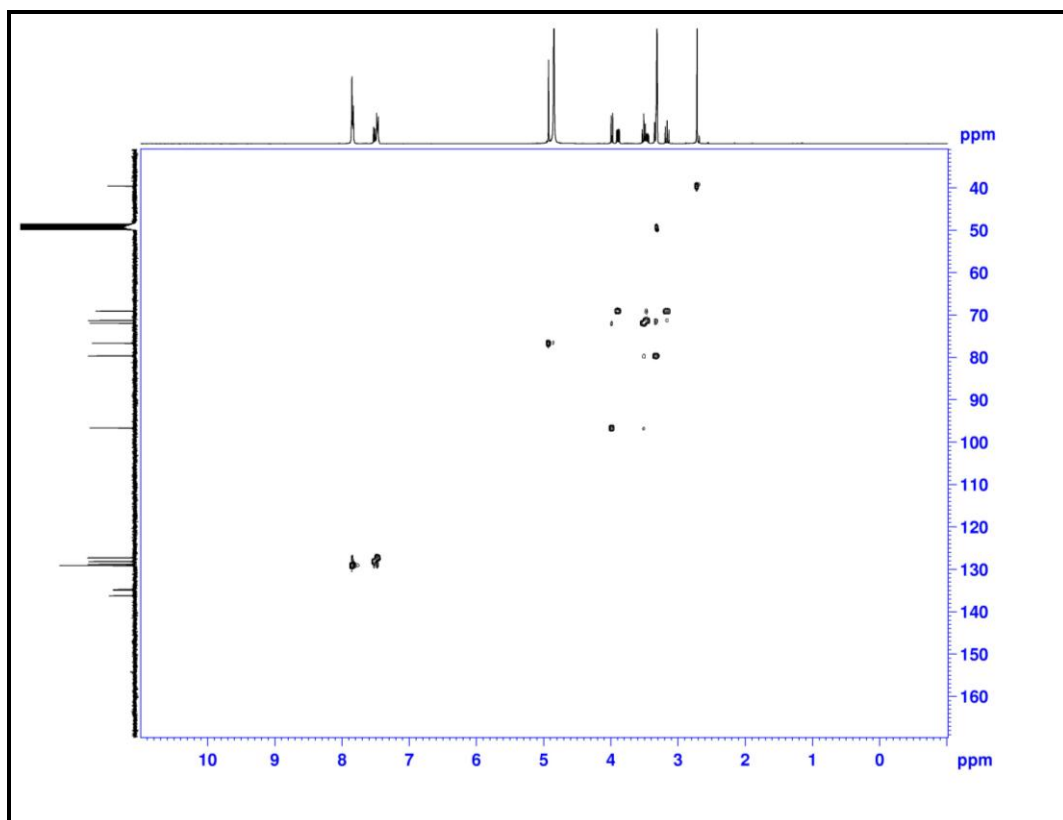

HSQC NMR spectrum of Xyl-b (400 MHz, CD<sub>3</sub>OD).

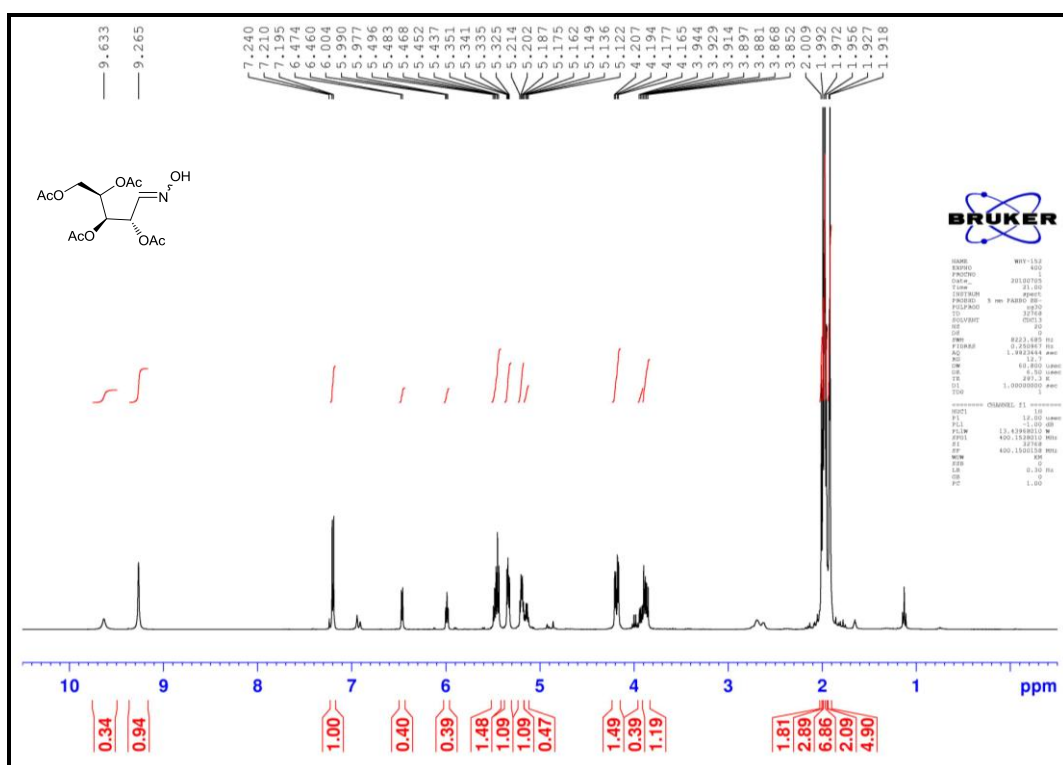

<sup>1</sup>H NMR spectrum of (Xyl-oxime)Ac<sub>4</sub> (400 MHz, CDCl<sub>3</sub>, a mixture of *E/Z* isomers (7:3))

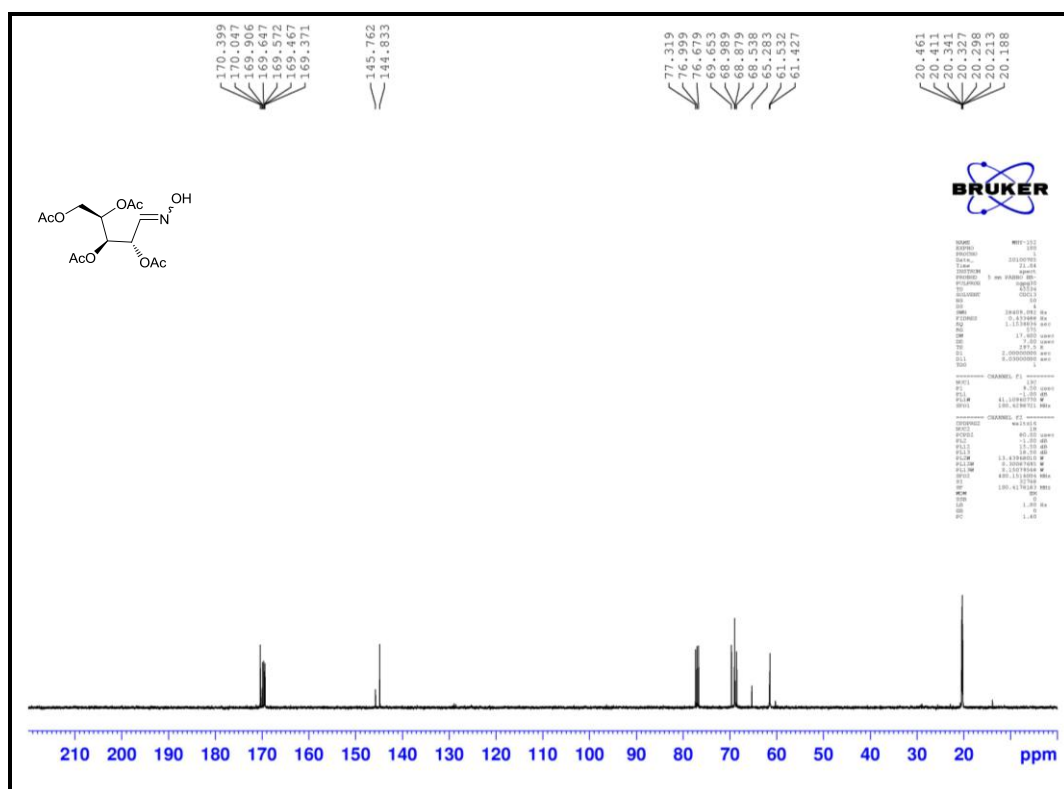

<sup>13</sup>C NMR spectrum of (Xyl-oxime)Ac<sub>4</sub> (100 MHz, CDCl<sub>3</sub>, a mixture of *E/Z* isomers (7:3))

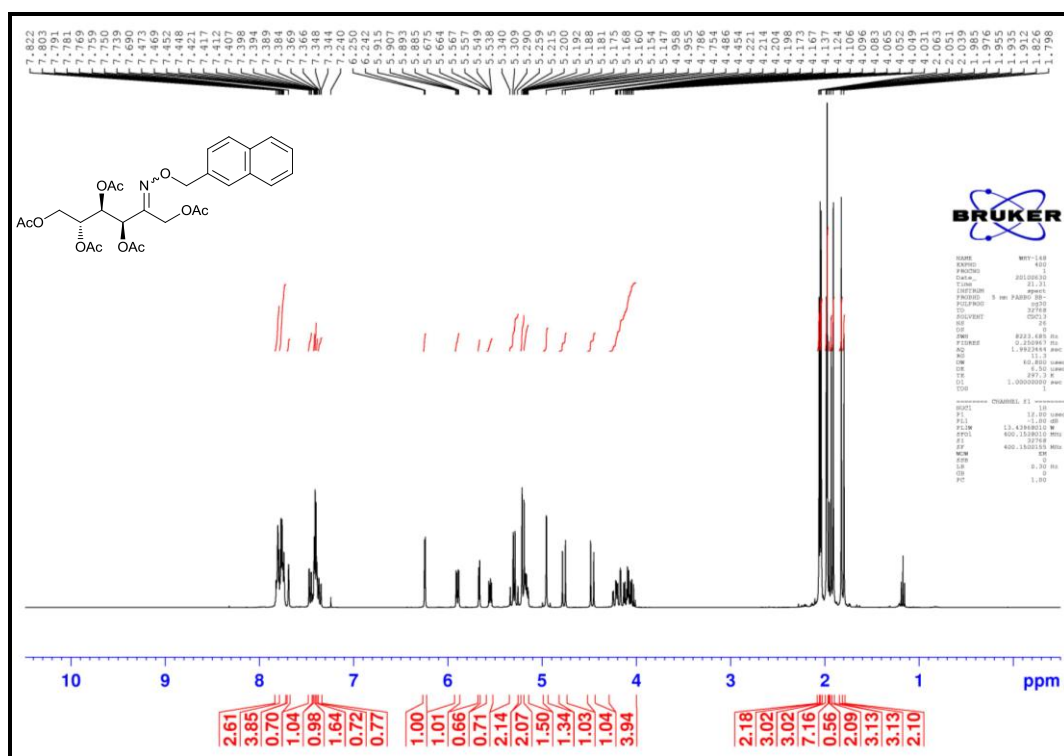

<sup>1</sup>H NMR spectrum of (Fru-a)Ac<sub>5</sub> (400 MHz, CDCl<sub>3</sub>, a mixture of *E/Z* isomers (3:2))

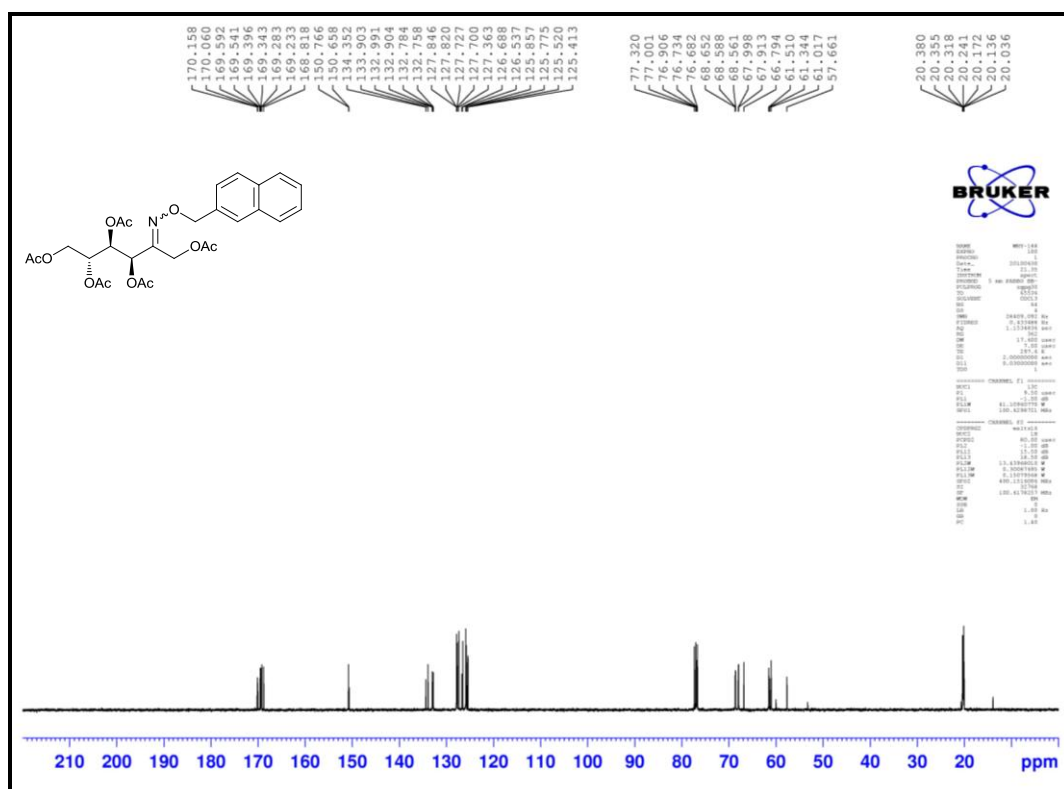

<sup>13</sup>C NMR spectrum of (Fru-a)Ac<sub>5</sub> (100 MHz, CDCl<sub>3</sub>, a mixture of *E/Z* isomers (3:2))

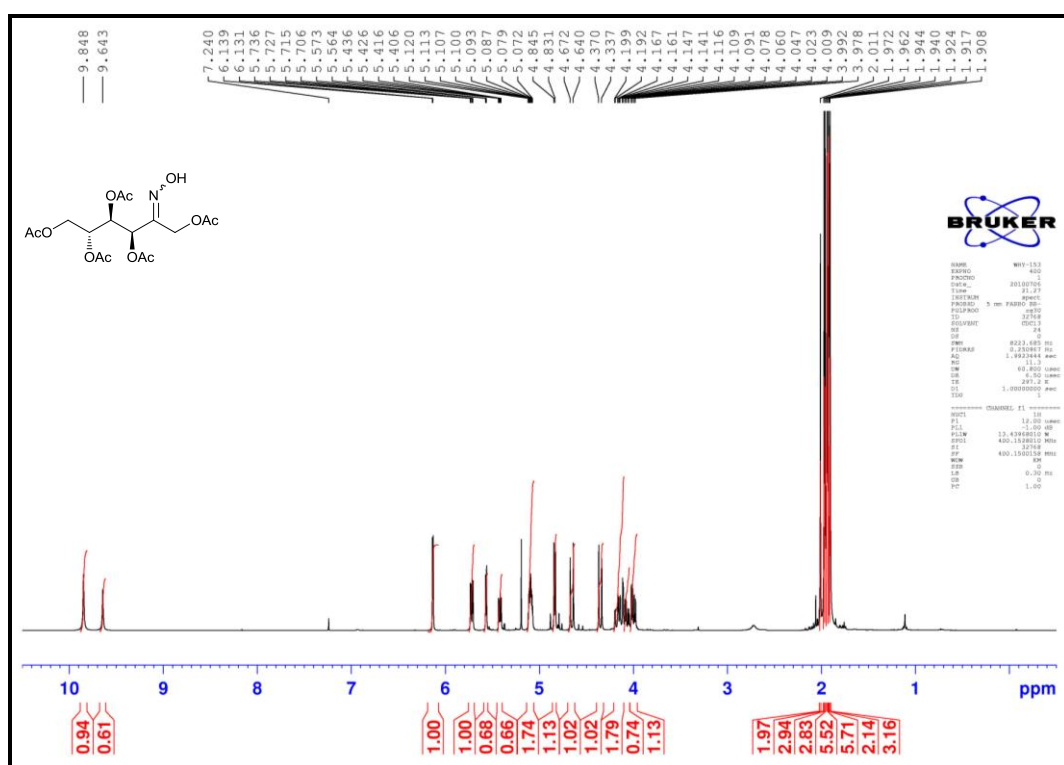

<sup>1</sup>H NMR spectrum of (Fru-oxime)Ac<sub>5</sub> (400 MHz, CDCl<sub>3</sub>, a mixture of *E/Z* isomers (3:2))





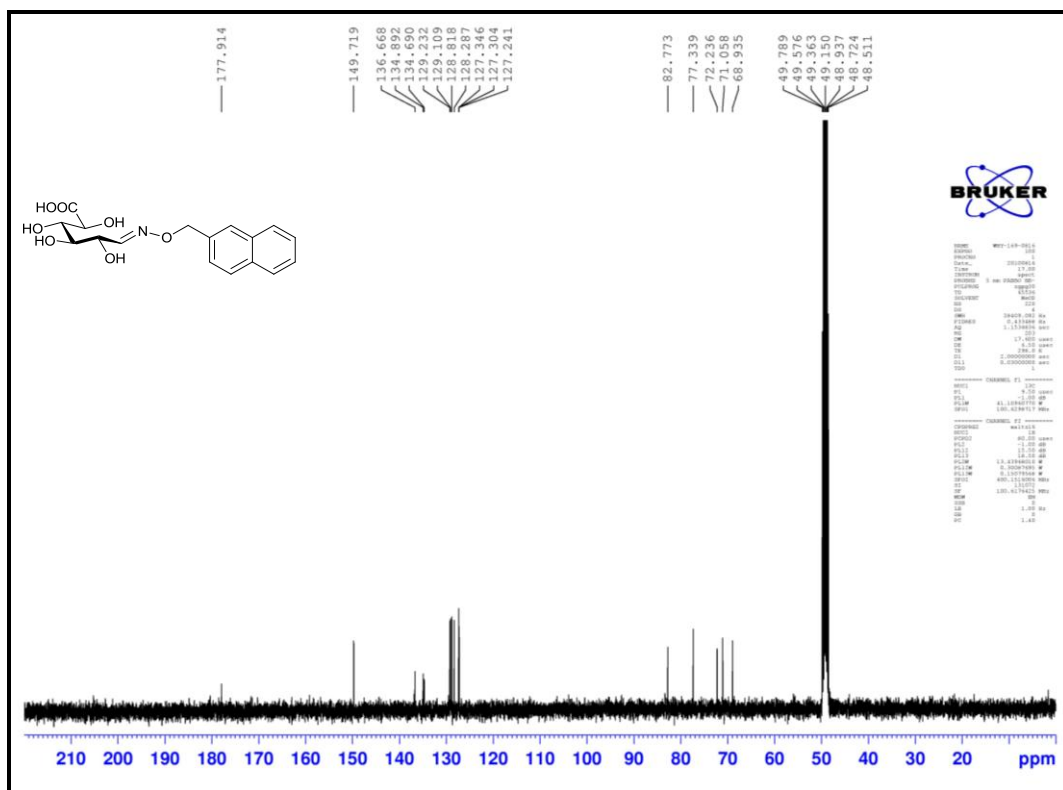

<sup>13</sup>C NMR spectrum of GlcA-a (100 MHz, CD<sub>3</sub>OD)

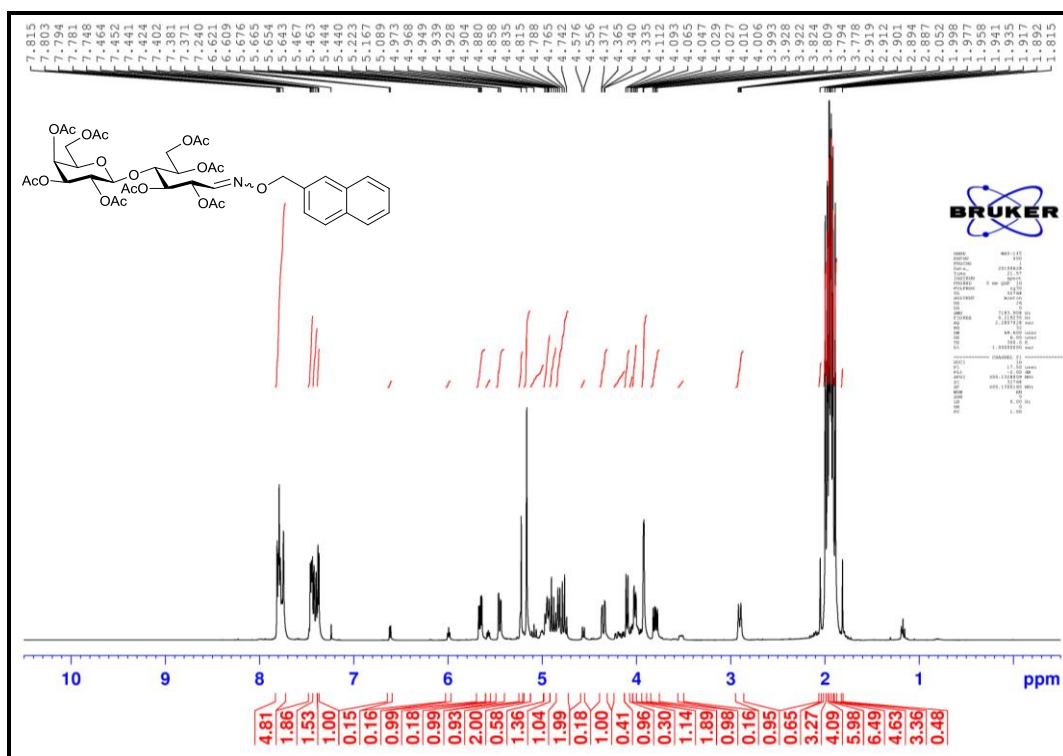

<sup>1</sup>H NMR spectrum of (Lac-a)Ac<sub>8</sub> (400 MHz, CDCl<sub>3</sub>, a mixture of *E/Z* isomers (4:1))

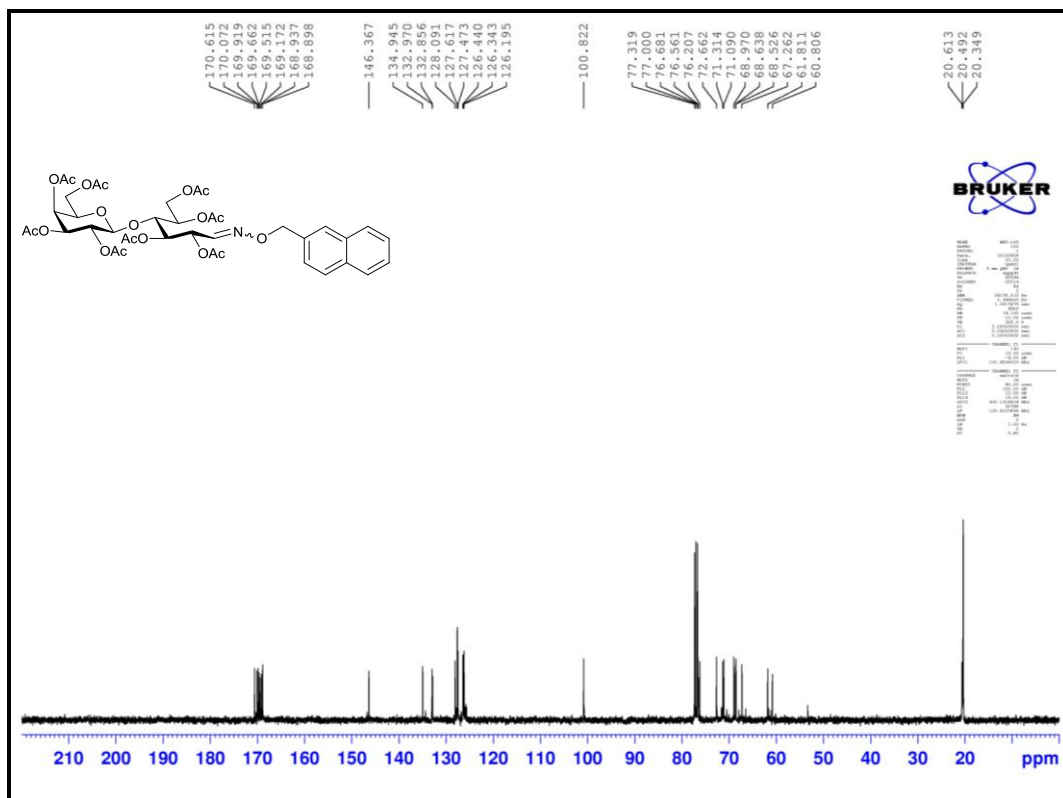

<sup>13</sup>C NMR spectrum of (Lac-a)Ac<sub>8</sub> (100 MHz, CDCl<sub>3</sub>, a mixture of *E/Z* isomers (4:1))

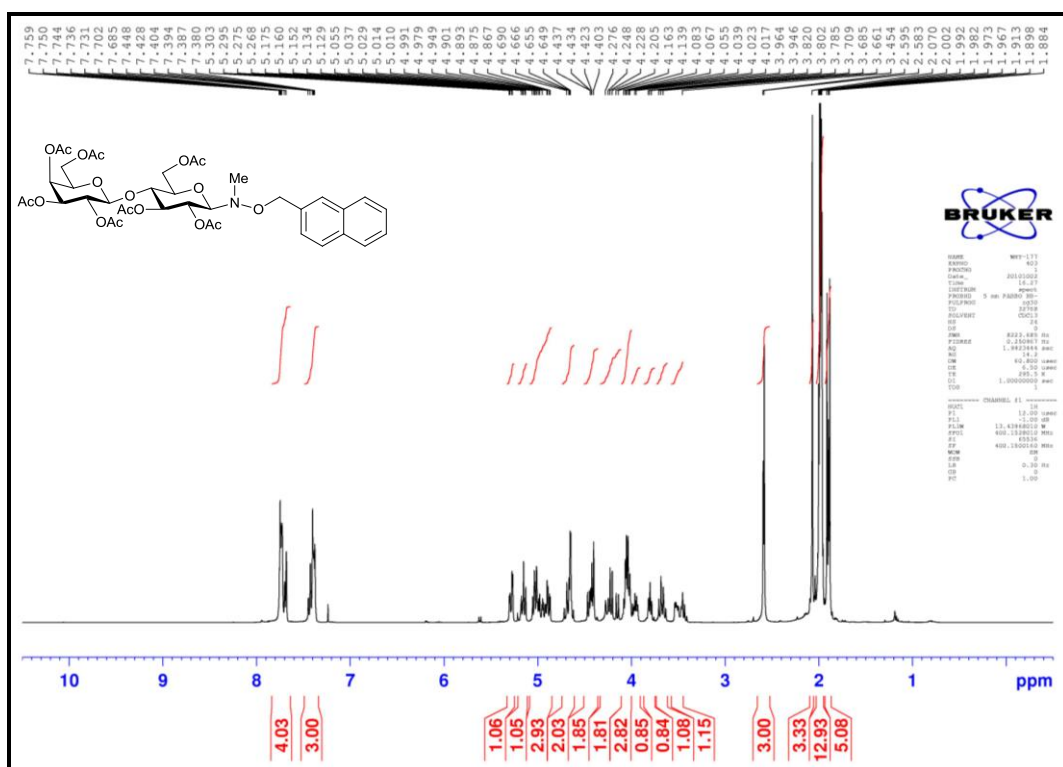

<sup>1</sup>H NMR spectrum of (Lac-b)Ac<sub>7</sub> (400 MHz, CDCl<sub>3</sub>)

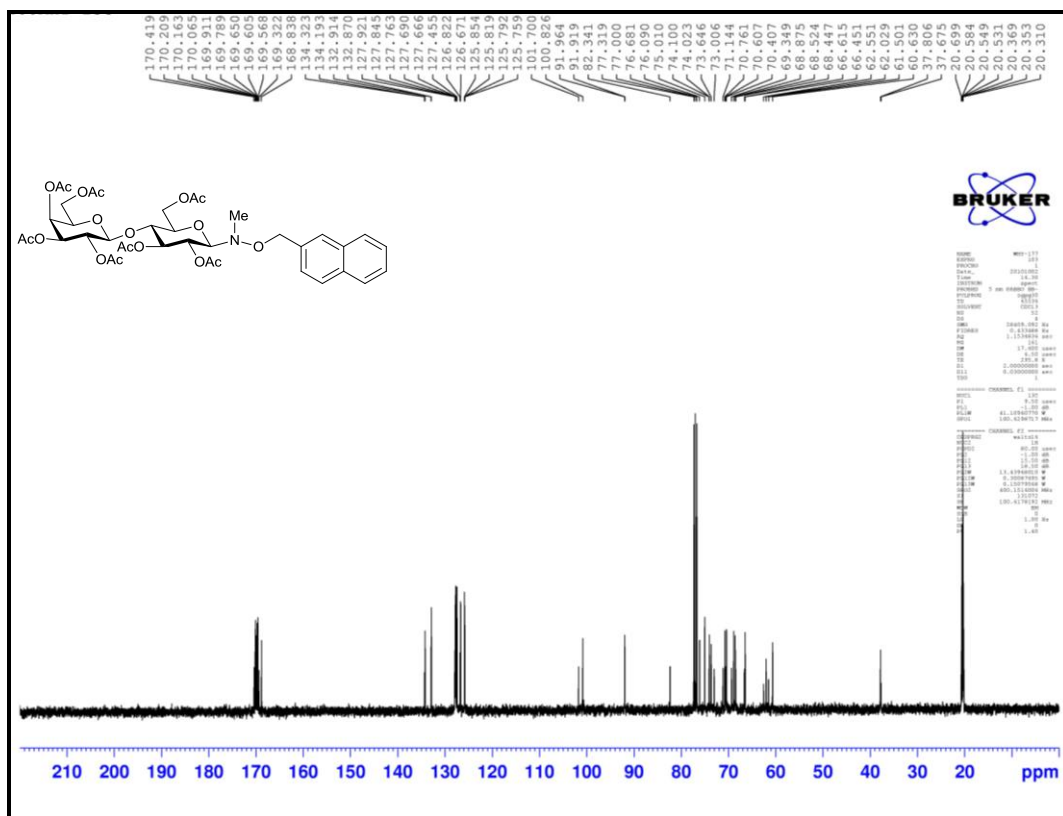

<sup>13</sup>C NMR spectrum of (Lac-b)Ac<sub>7</sub> (400 MHz, CDCl<sub>3</sub>, rotamer)

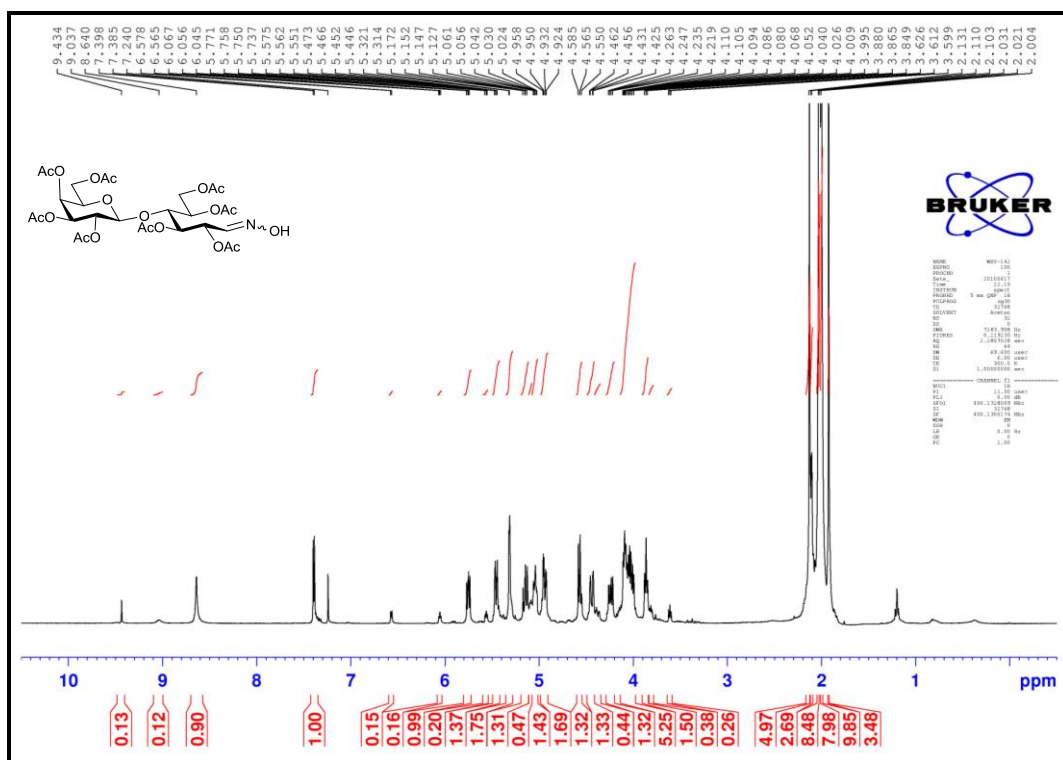

<sup>1</sup>H NMR spectrum of (Lac-oxime)Ac<sub>8</sub> (400 MHz, CDCl<sub>3</sub>, a mixture of *E/Z* isomers (4:1))

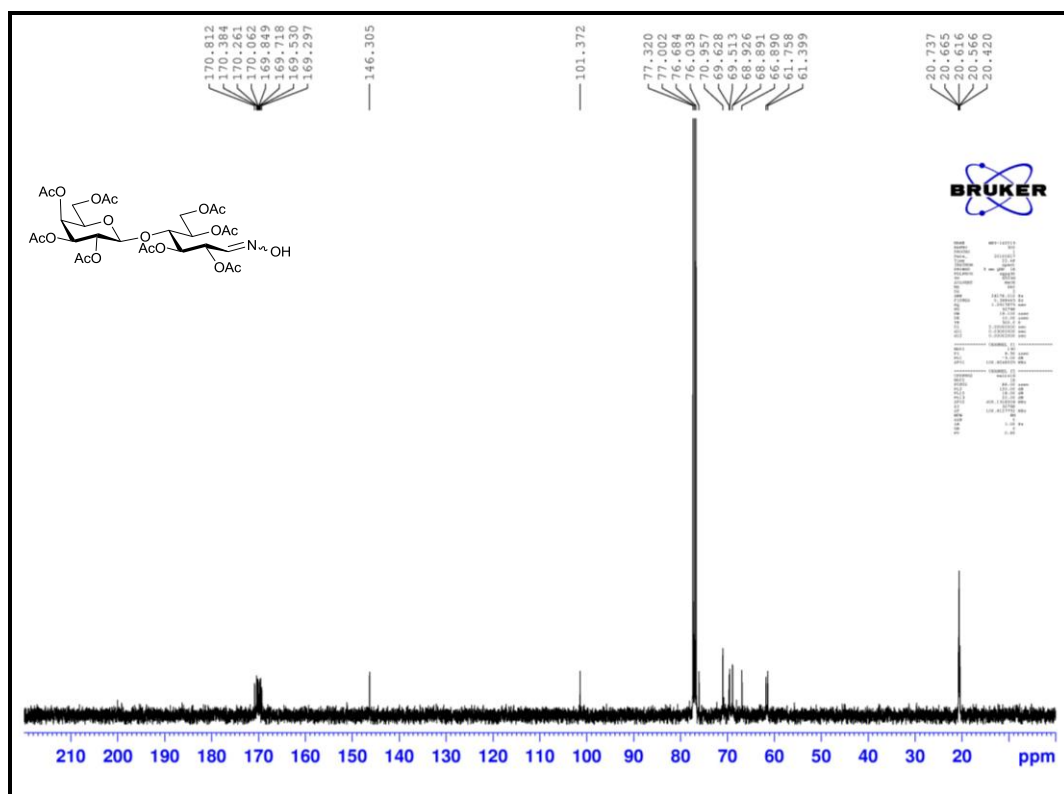

<sup>13</sup>C NMR spectrum of (Lac-oxime)Ac<sub>8</sub> (100 MHz, CDCl<sub>3</sub>, a mixture of *E/Z* isomers (4:1))

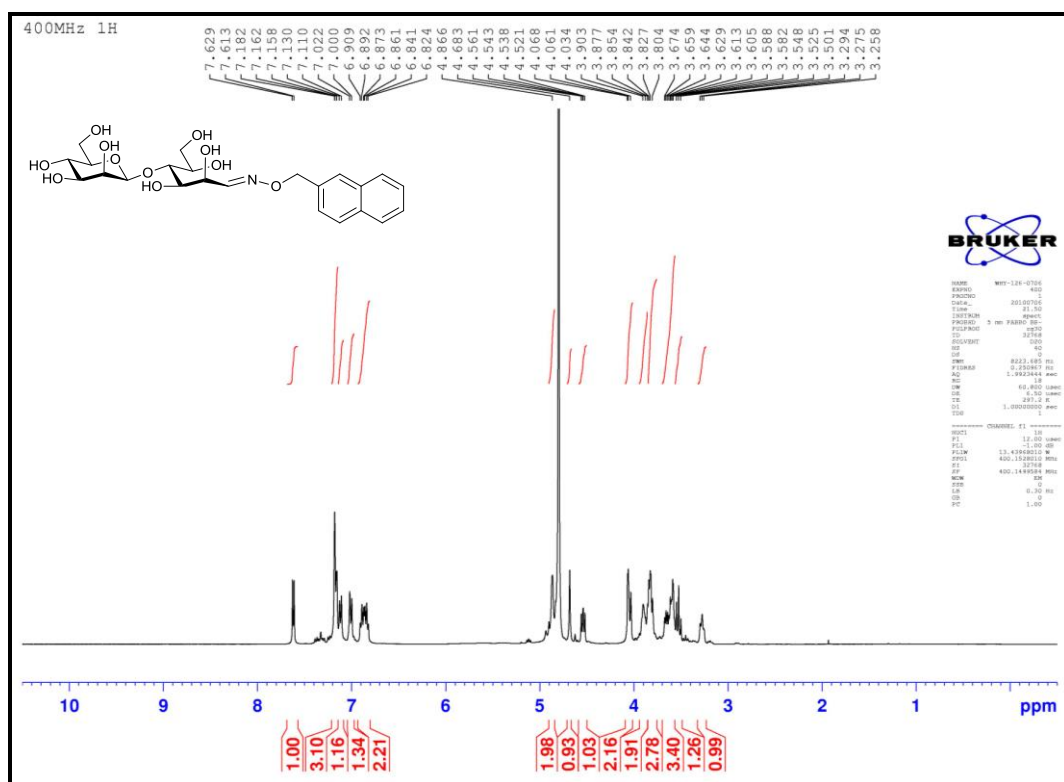

<sup>1</sup>H NMR spectrum of Man<sub>2</sub>-a (400 MHz, D<sub>2</sub>O)

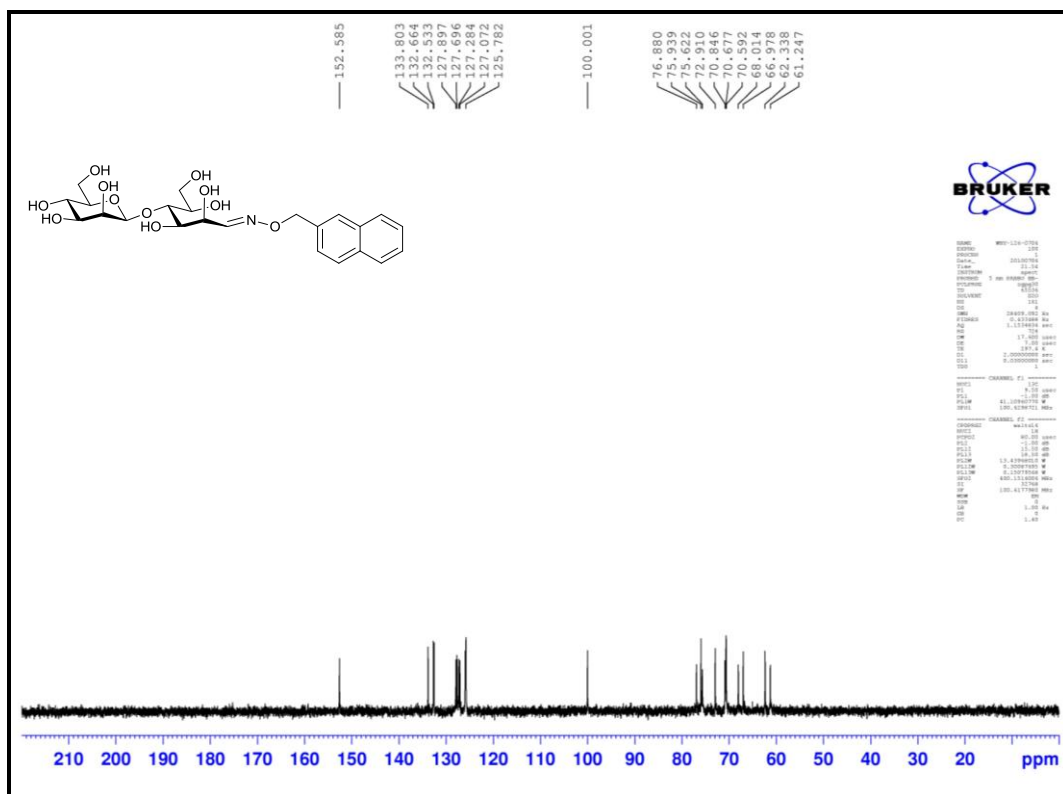

<sup>13</sup>C NMR spectrum of Man<sub>2</sub>-a (100 MHz, D<sub>2</sub>O)

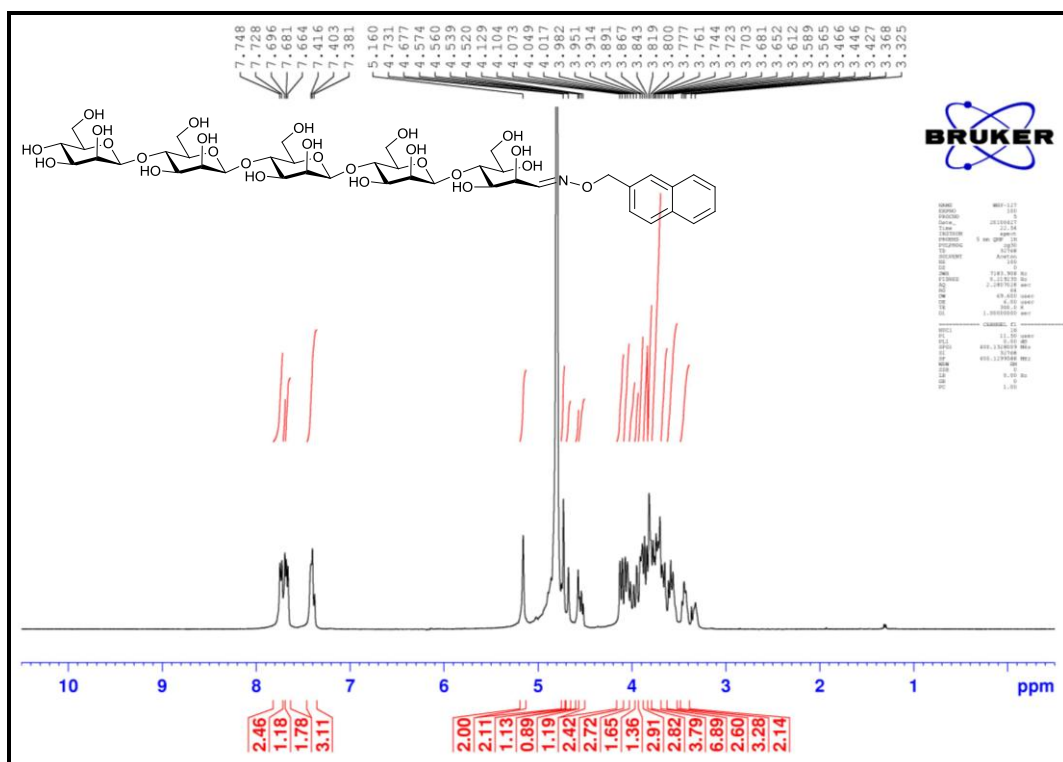



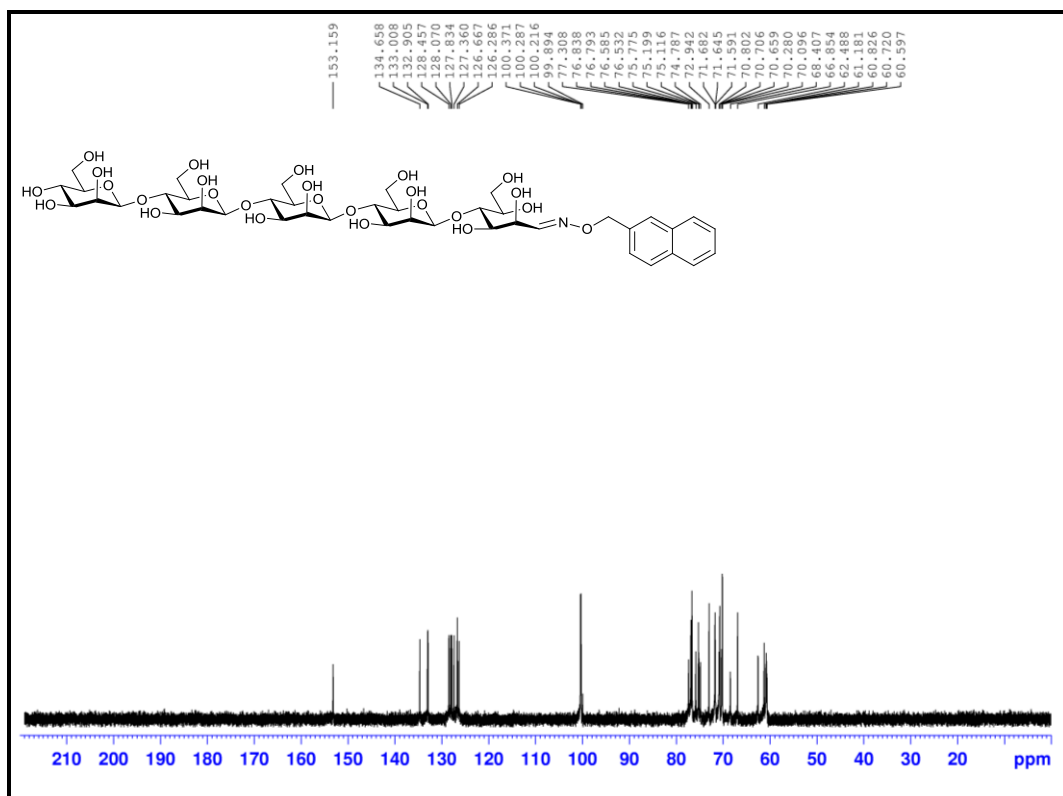

<sup>13</sup>C NMR spectrum of Man<sub>5</sub>-a (100 MHz, D<sub>2</sub>O)

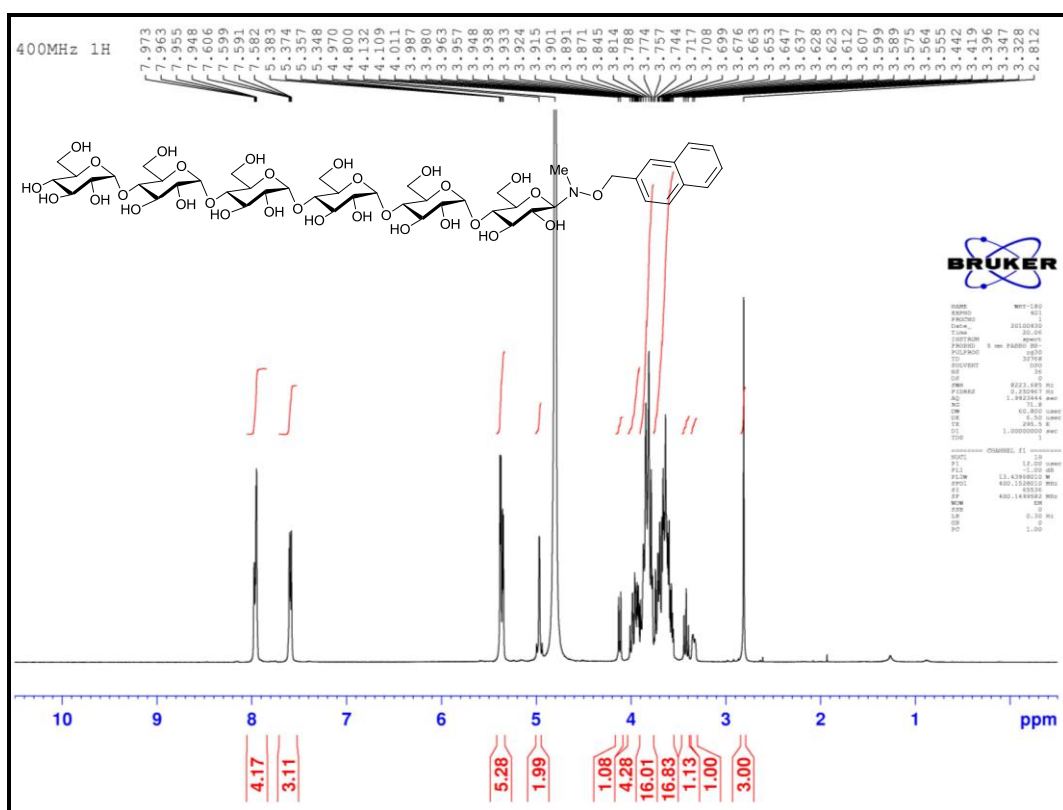

<sup>1</sup>H NMR spectrum of Glc<sub>6</sub>-b (400 MHz, D<sub>2</sub>O)

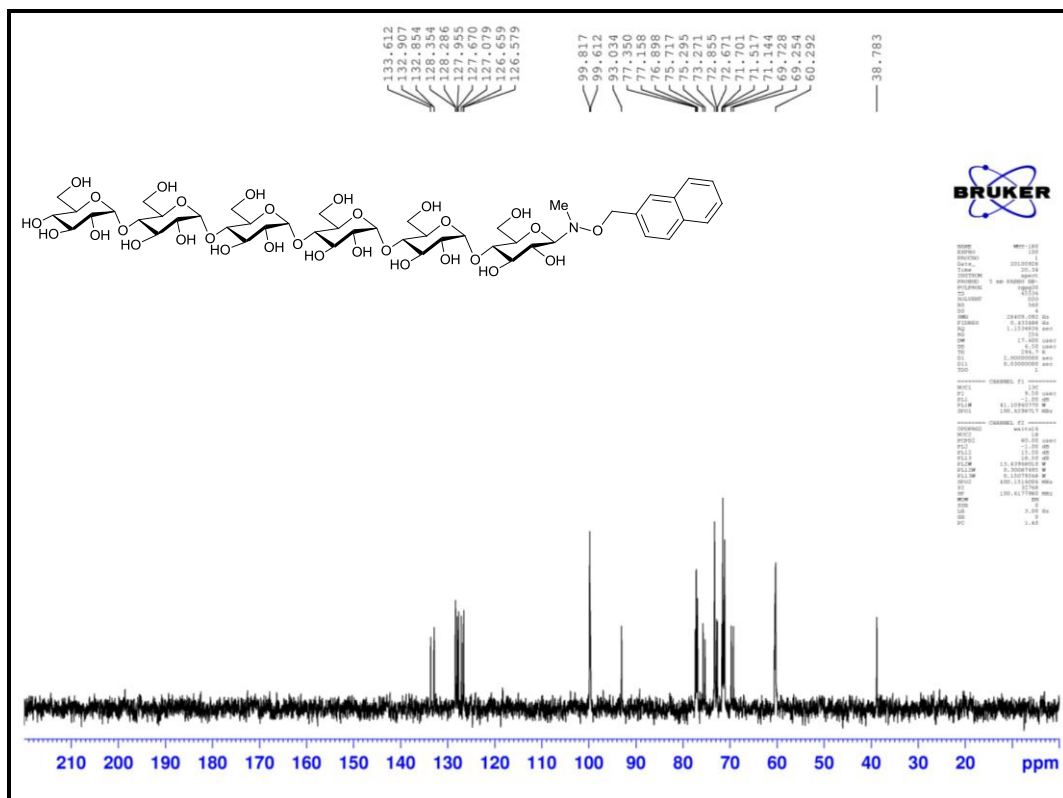

<sup>13</sup>C NMR spectrum of Glc<sub>6</sub>-b (100 MHz, D<sub>2</sub>O)

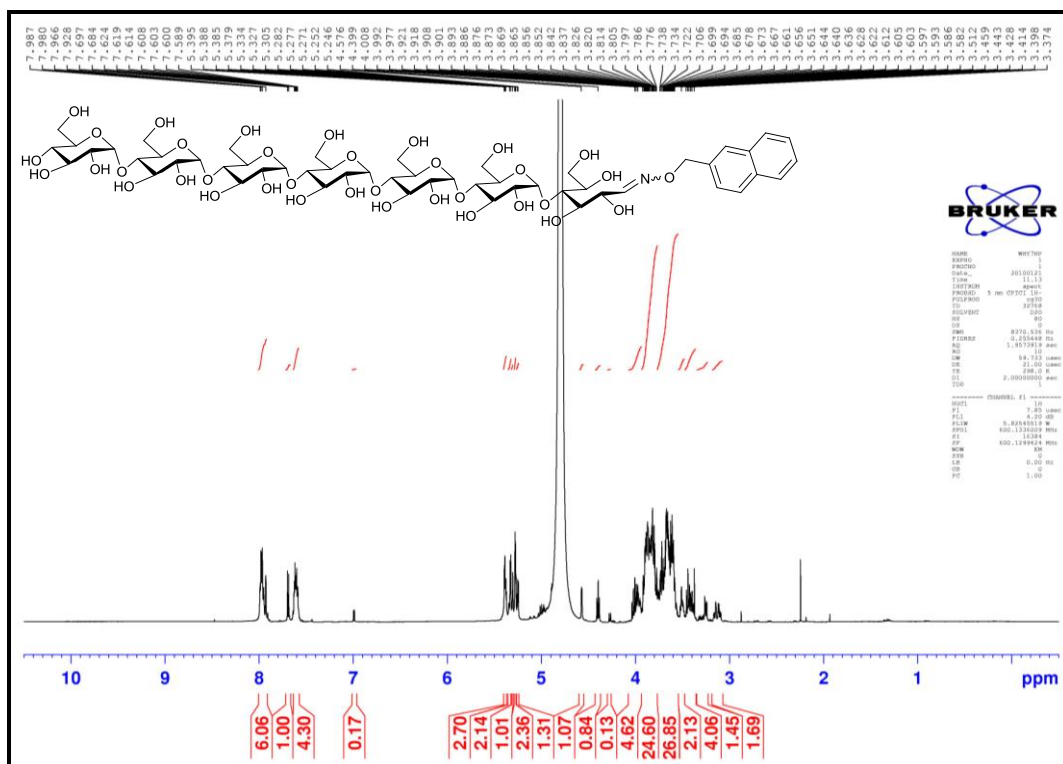

<sup>1</sup>H NMR spectrum of Glc<sub>7</sub>-a (600 MHz, D<sub>2</sub>O, a mixture of *E/Z* isomers (4:1))

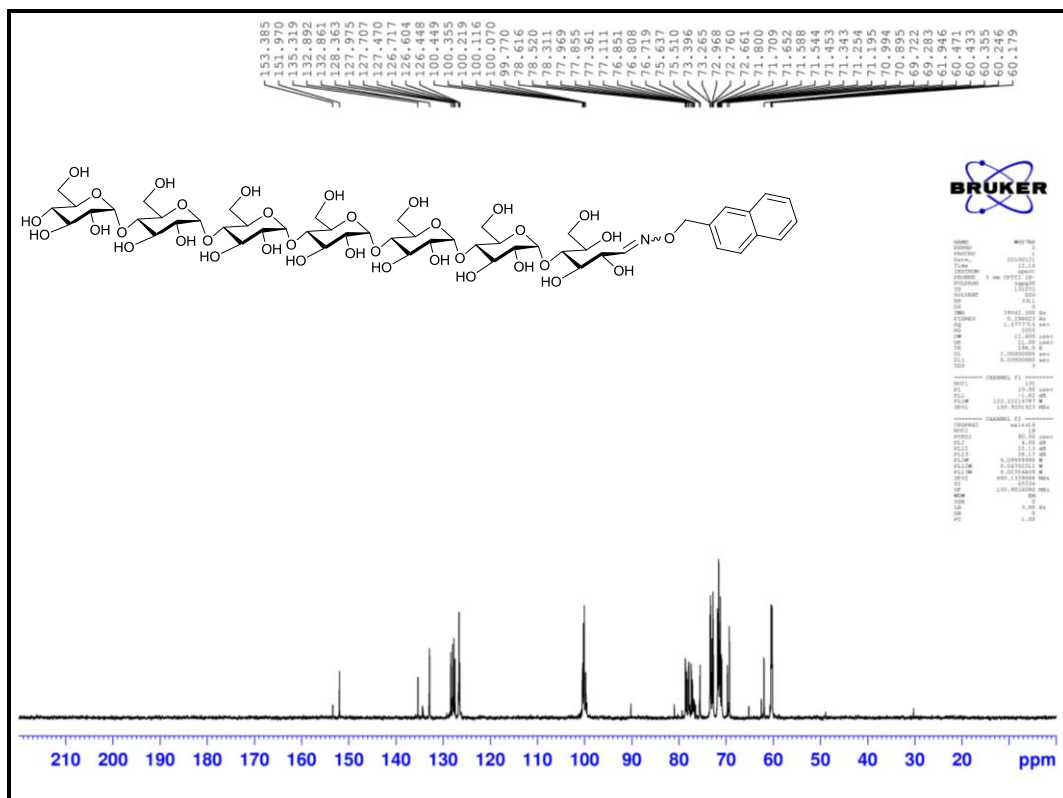

<sup>13</sup>C NMR spectrum of Glc7-a (150 MHz, D<sub>2</sub>O, a mixture of *E/Z* isomers (4:1))

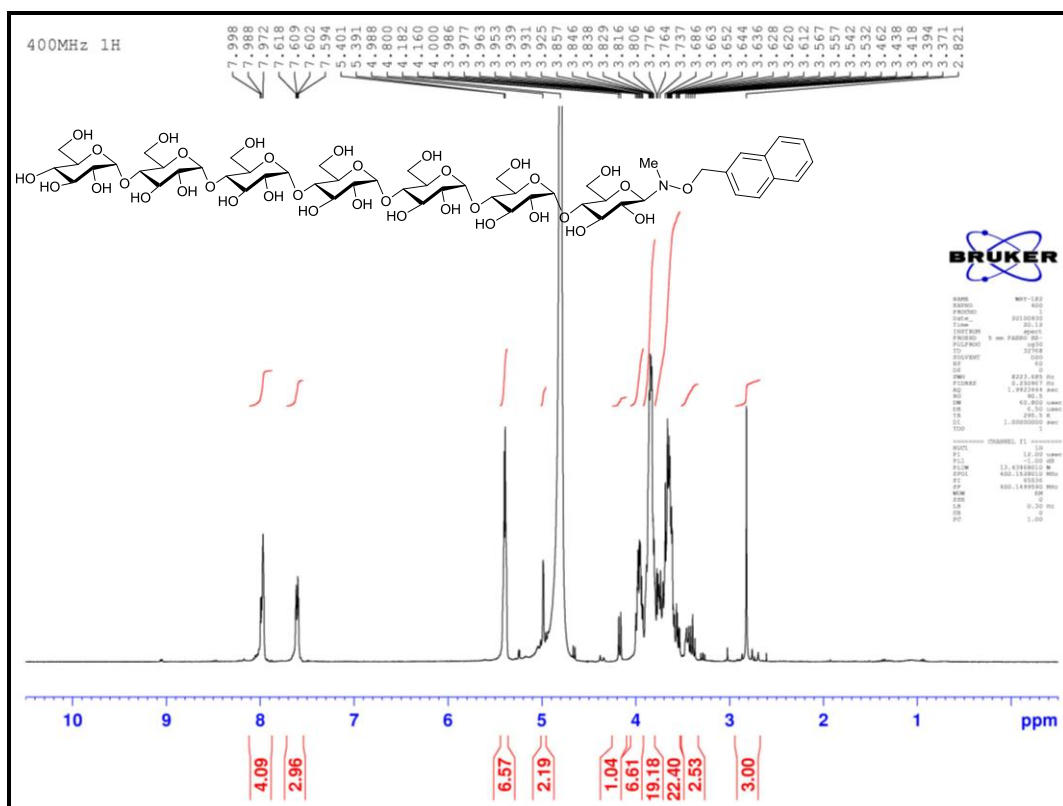

<sup>1</sup>H NMR spectrum of Glc7-b (400 MHz, D<sub>2</sub>O)

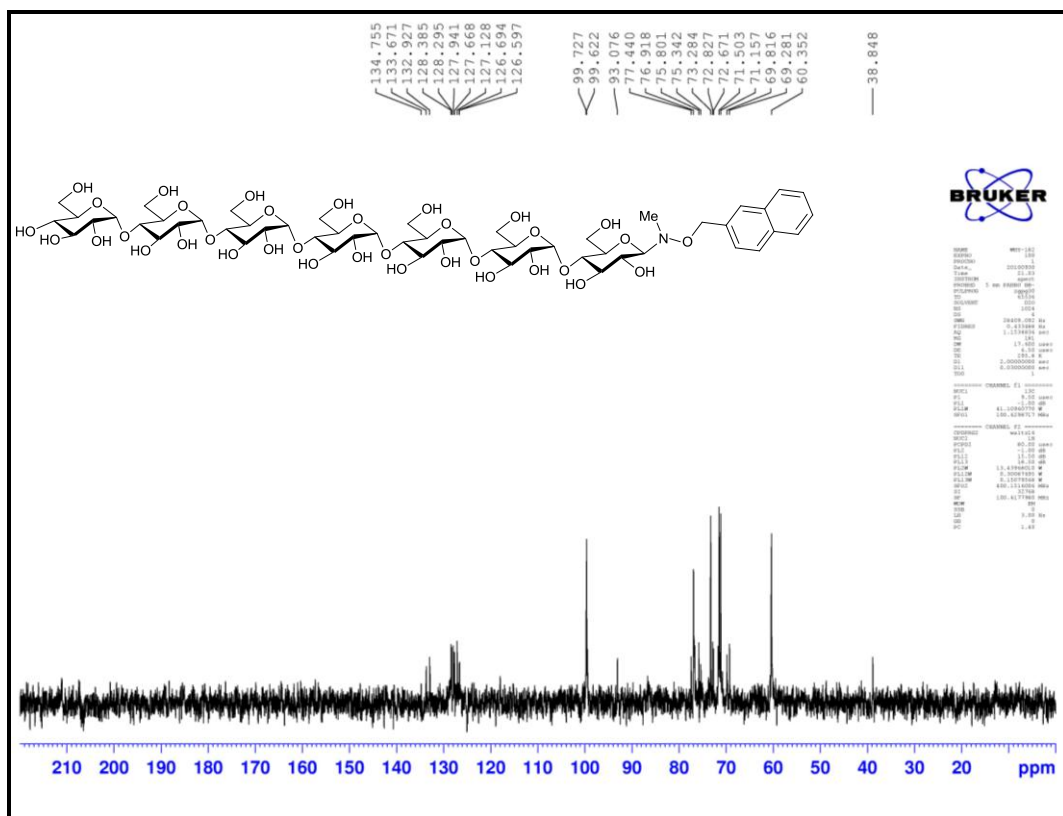

**<sup>13</sup>C NMR spectrum of Glc7-b (100 MHz, D<sub>2</sub>O)**
